# Supplementary material for: Promoting peptide α-helix formation with dynamic covalent oxime side-chain cross-links
Source: Royal Society of Chemistry journal article supplement (doi:10.1039/c1cc12010g), 2011-01-01

# **Promoting Peptide $\alpha$ -Helix Formation with Dynamic Covalent Oxime Side-Chain Cross-Links**

Conor M. Haney, Matthew T. Loch, and W. Seth Horne\*

*Department of Chemistry, University of Pittsburgh, Pittsburgh, PA 15260*

## **SUPPORTING INFORMATION**

### **NMR SPECTRA**

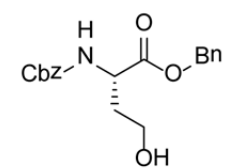

**S3a**

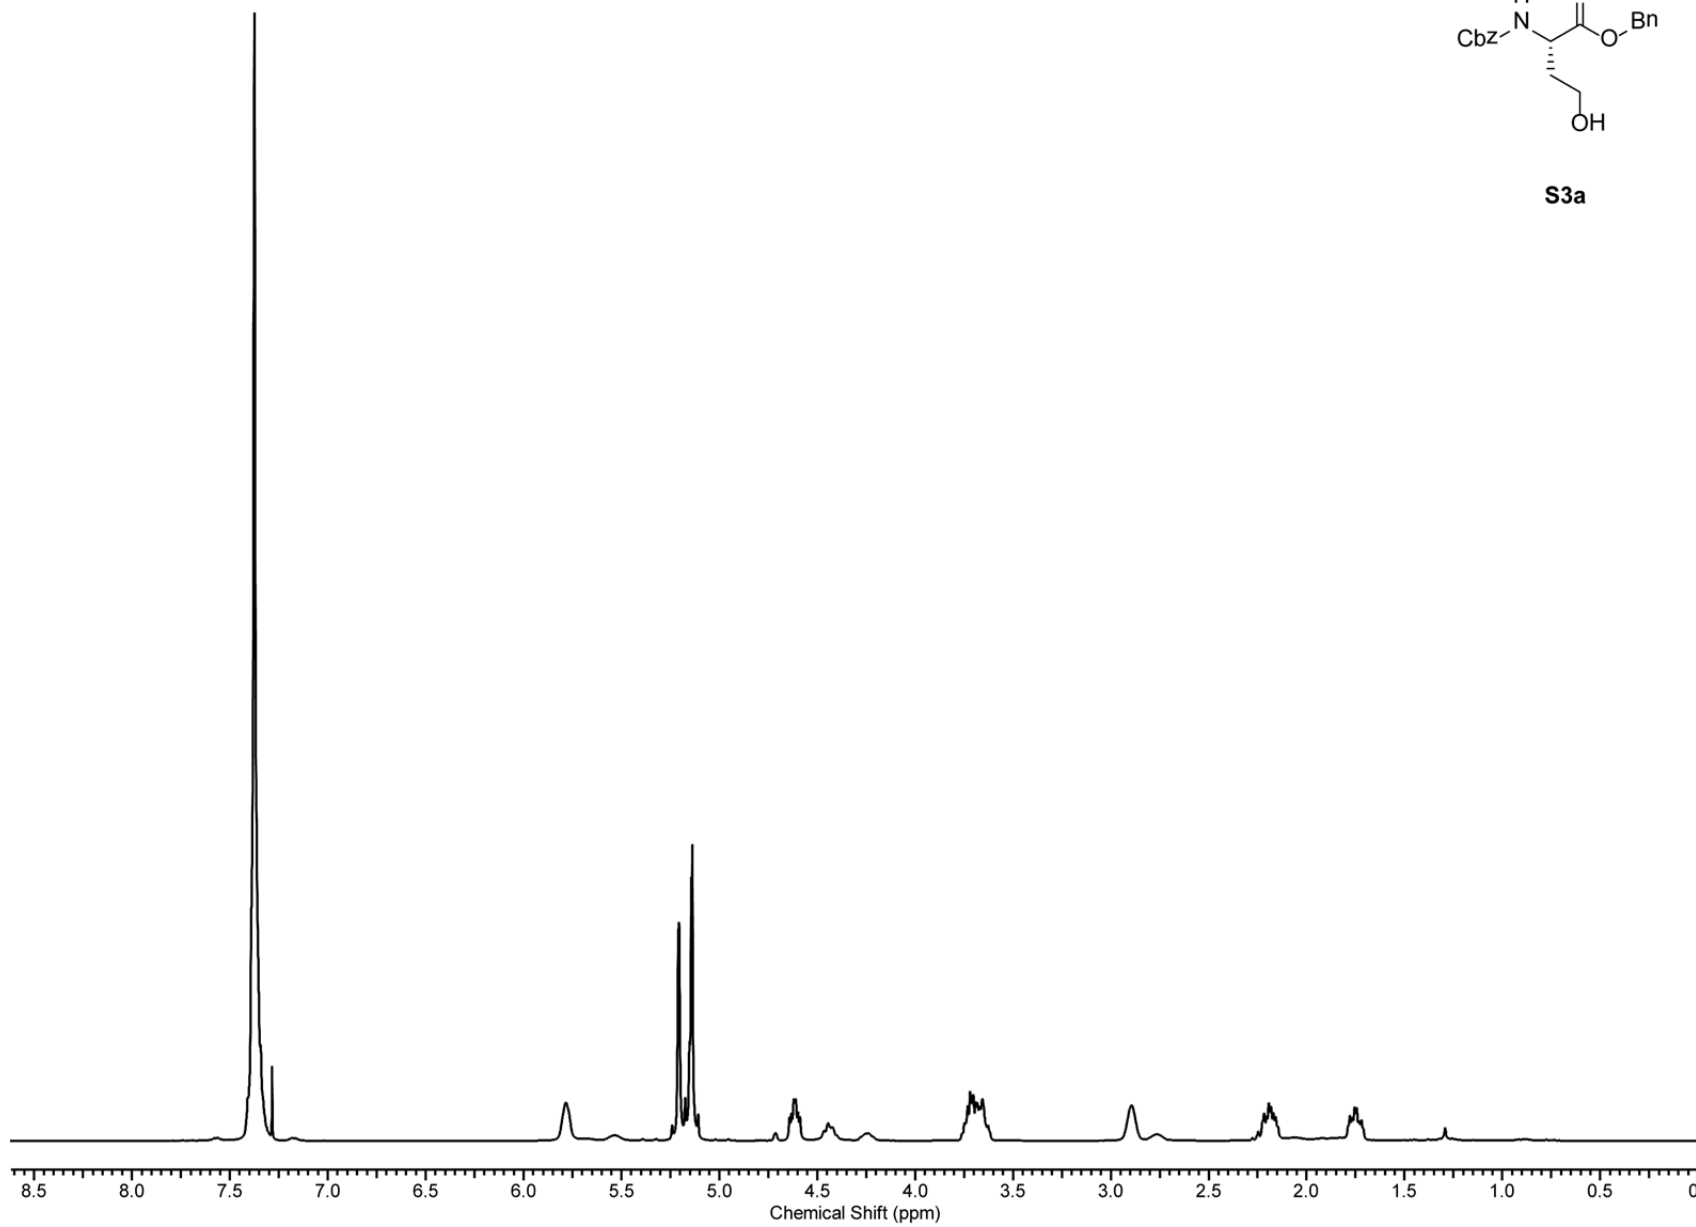

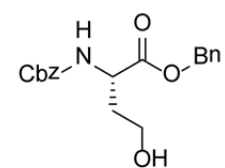

**S3a**

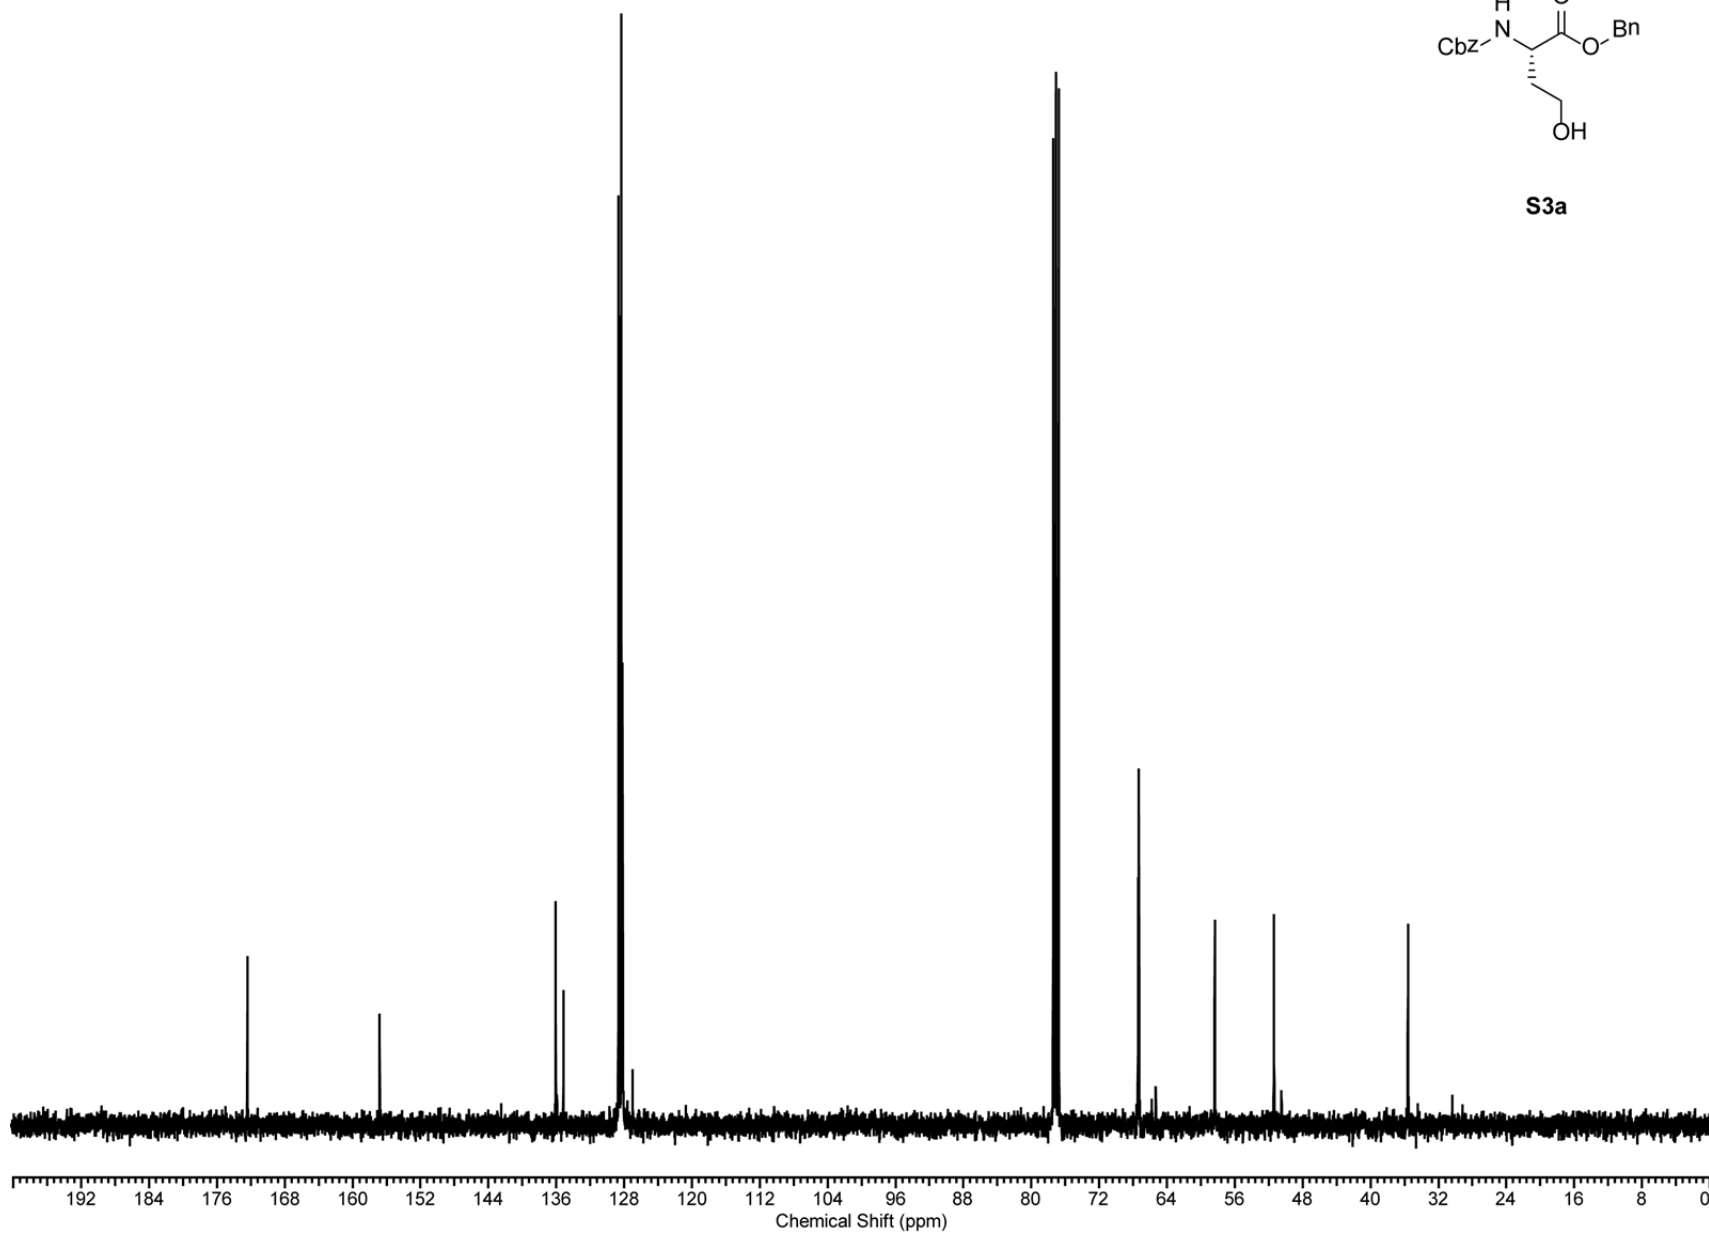

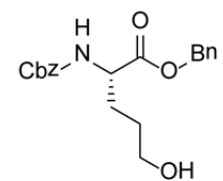

**S3b**

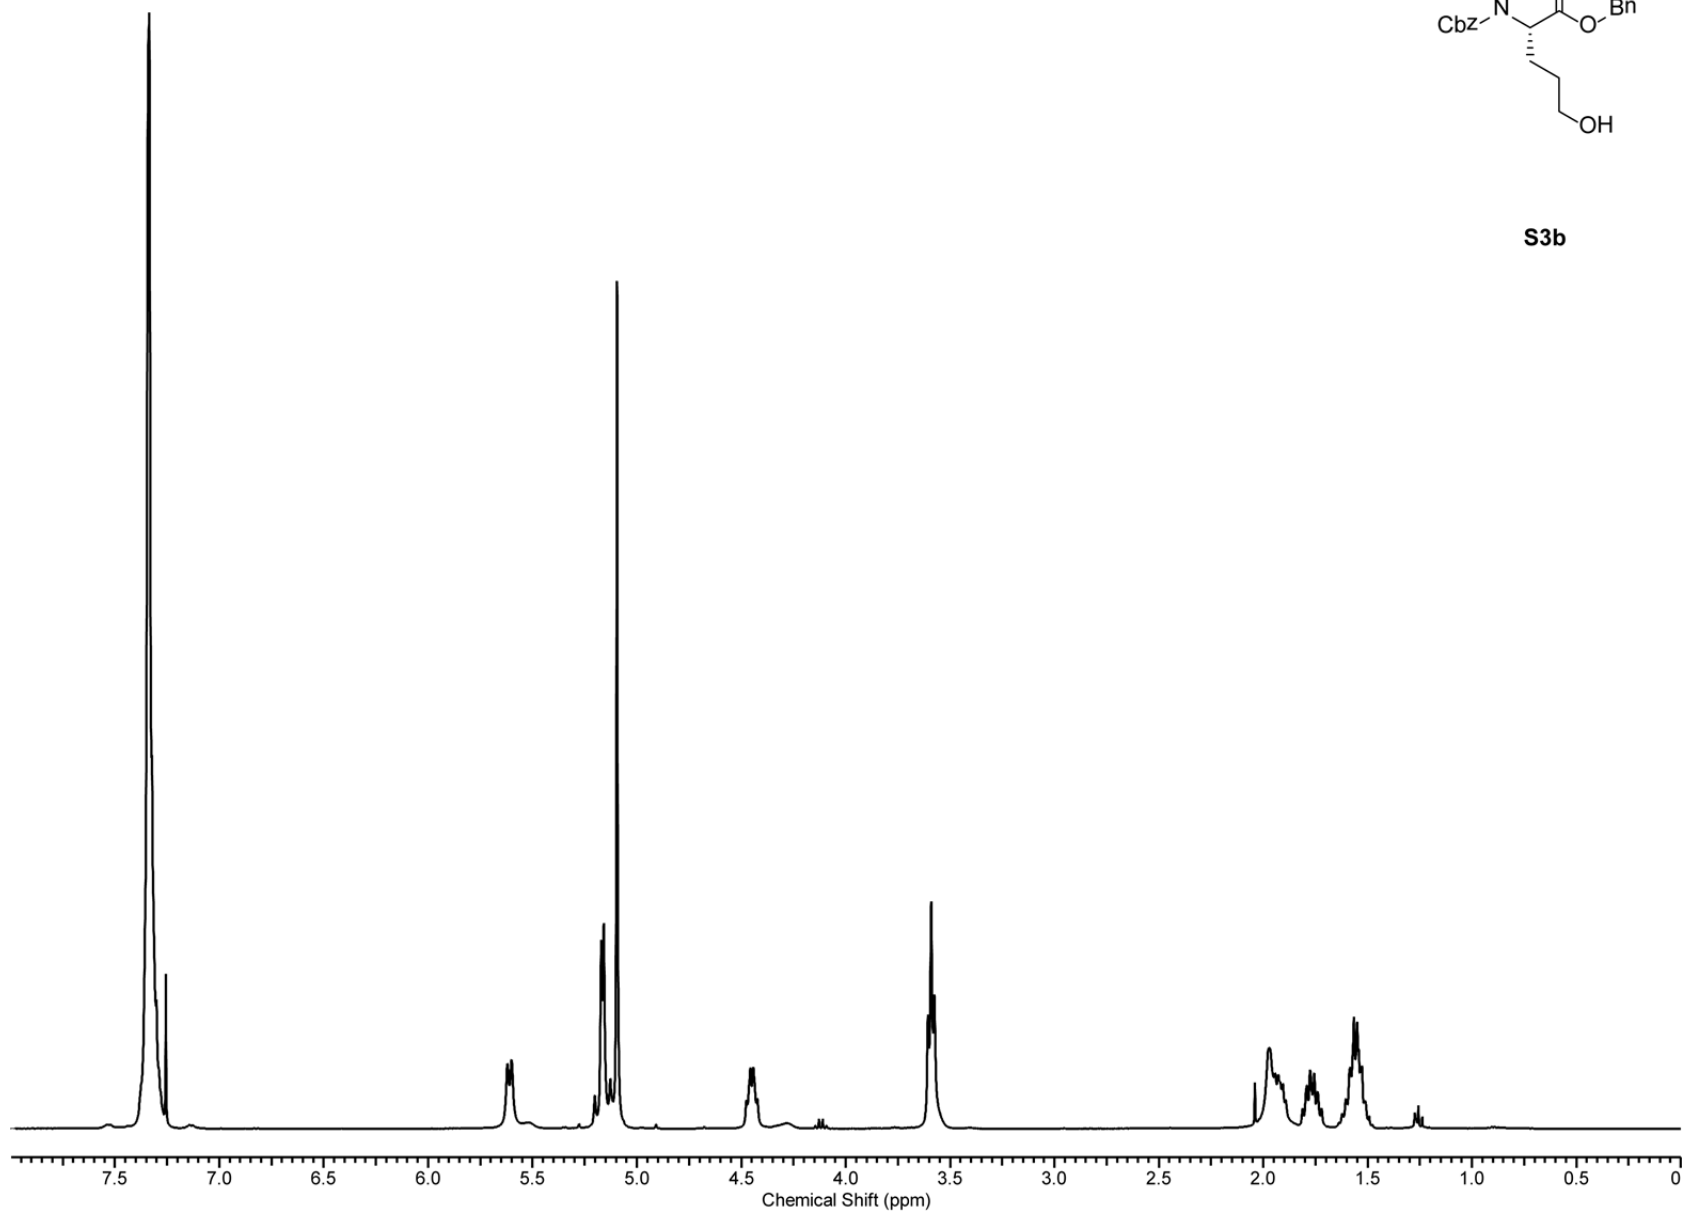

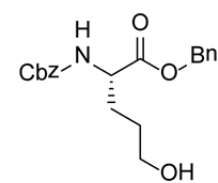

**S3b**

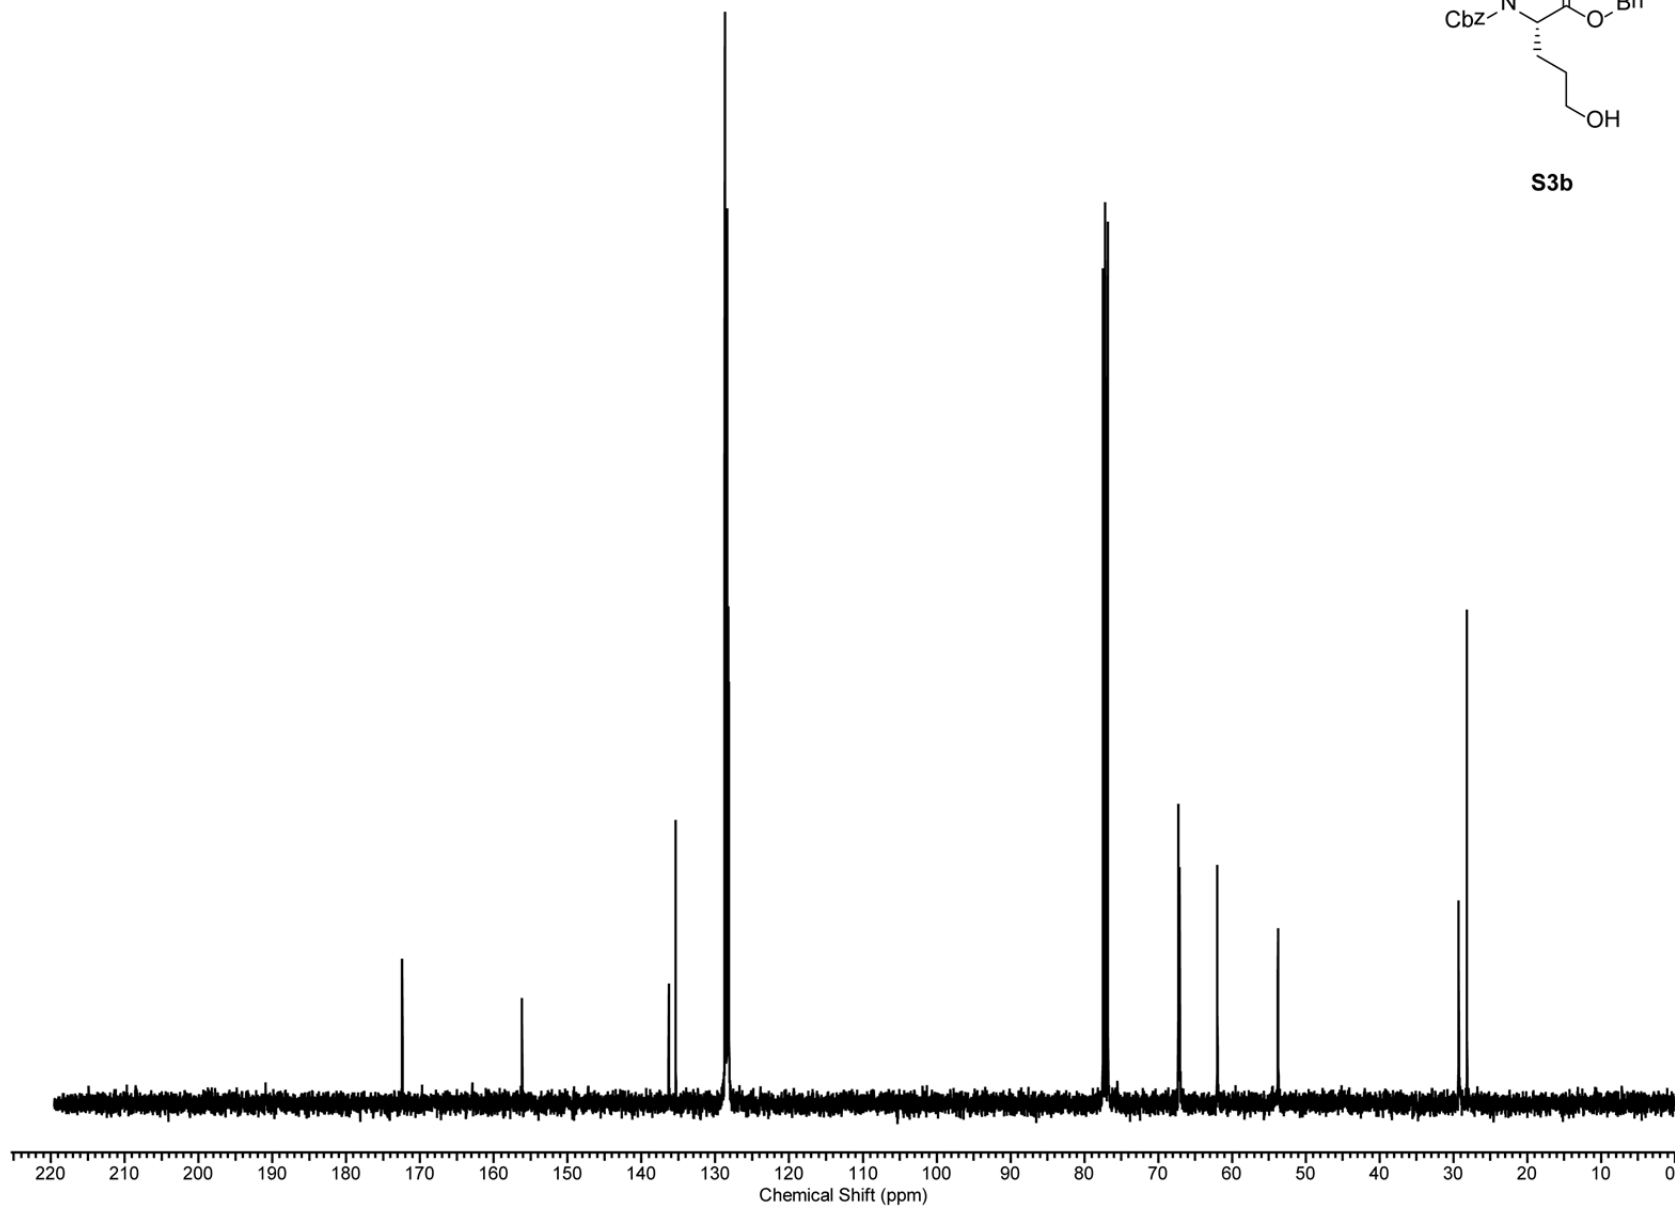

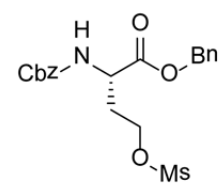

**S4a**

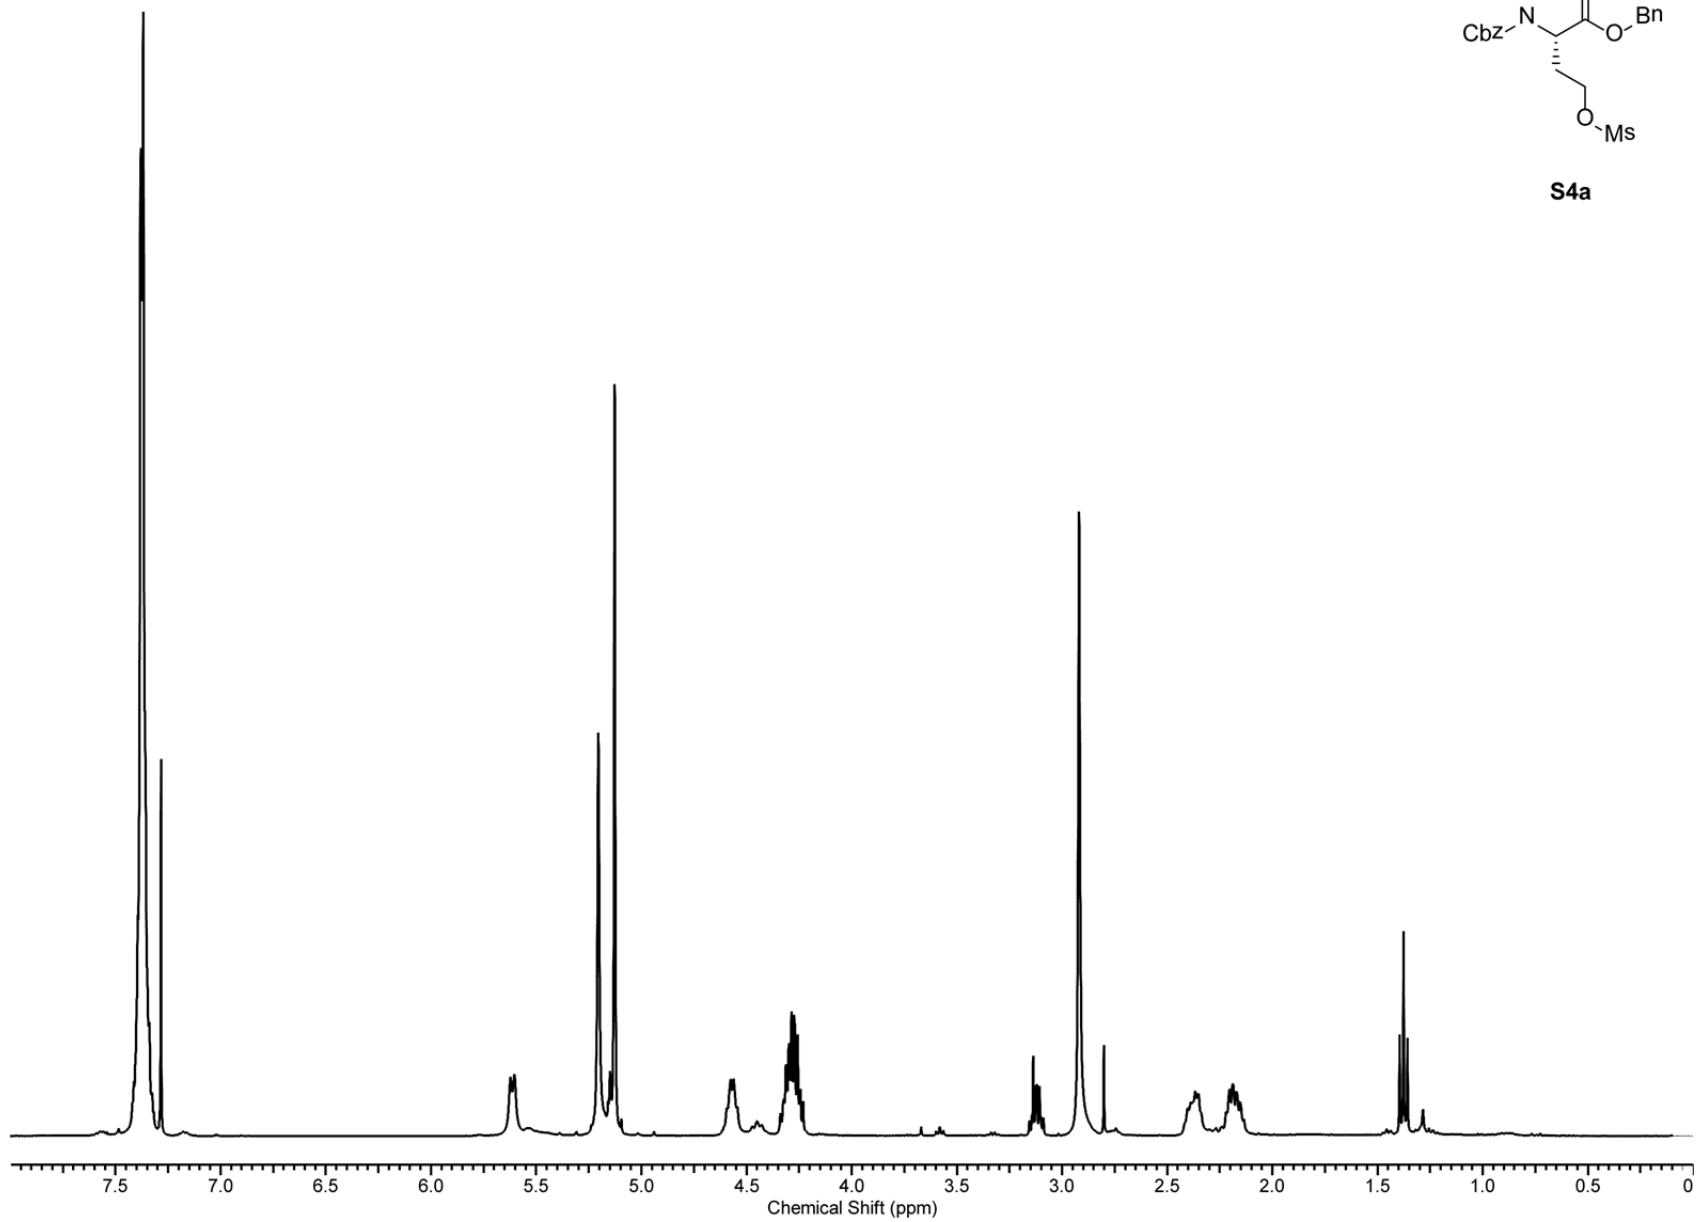

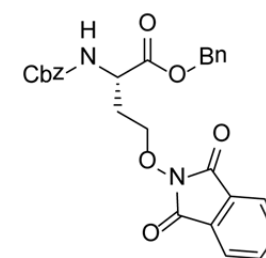

**S5a**

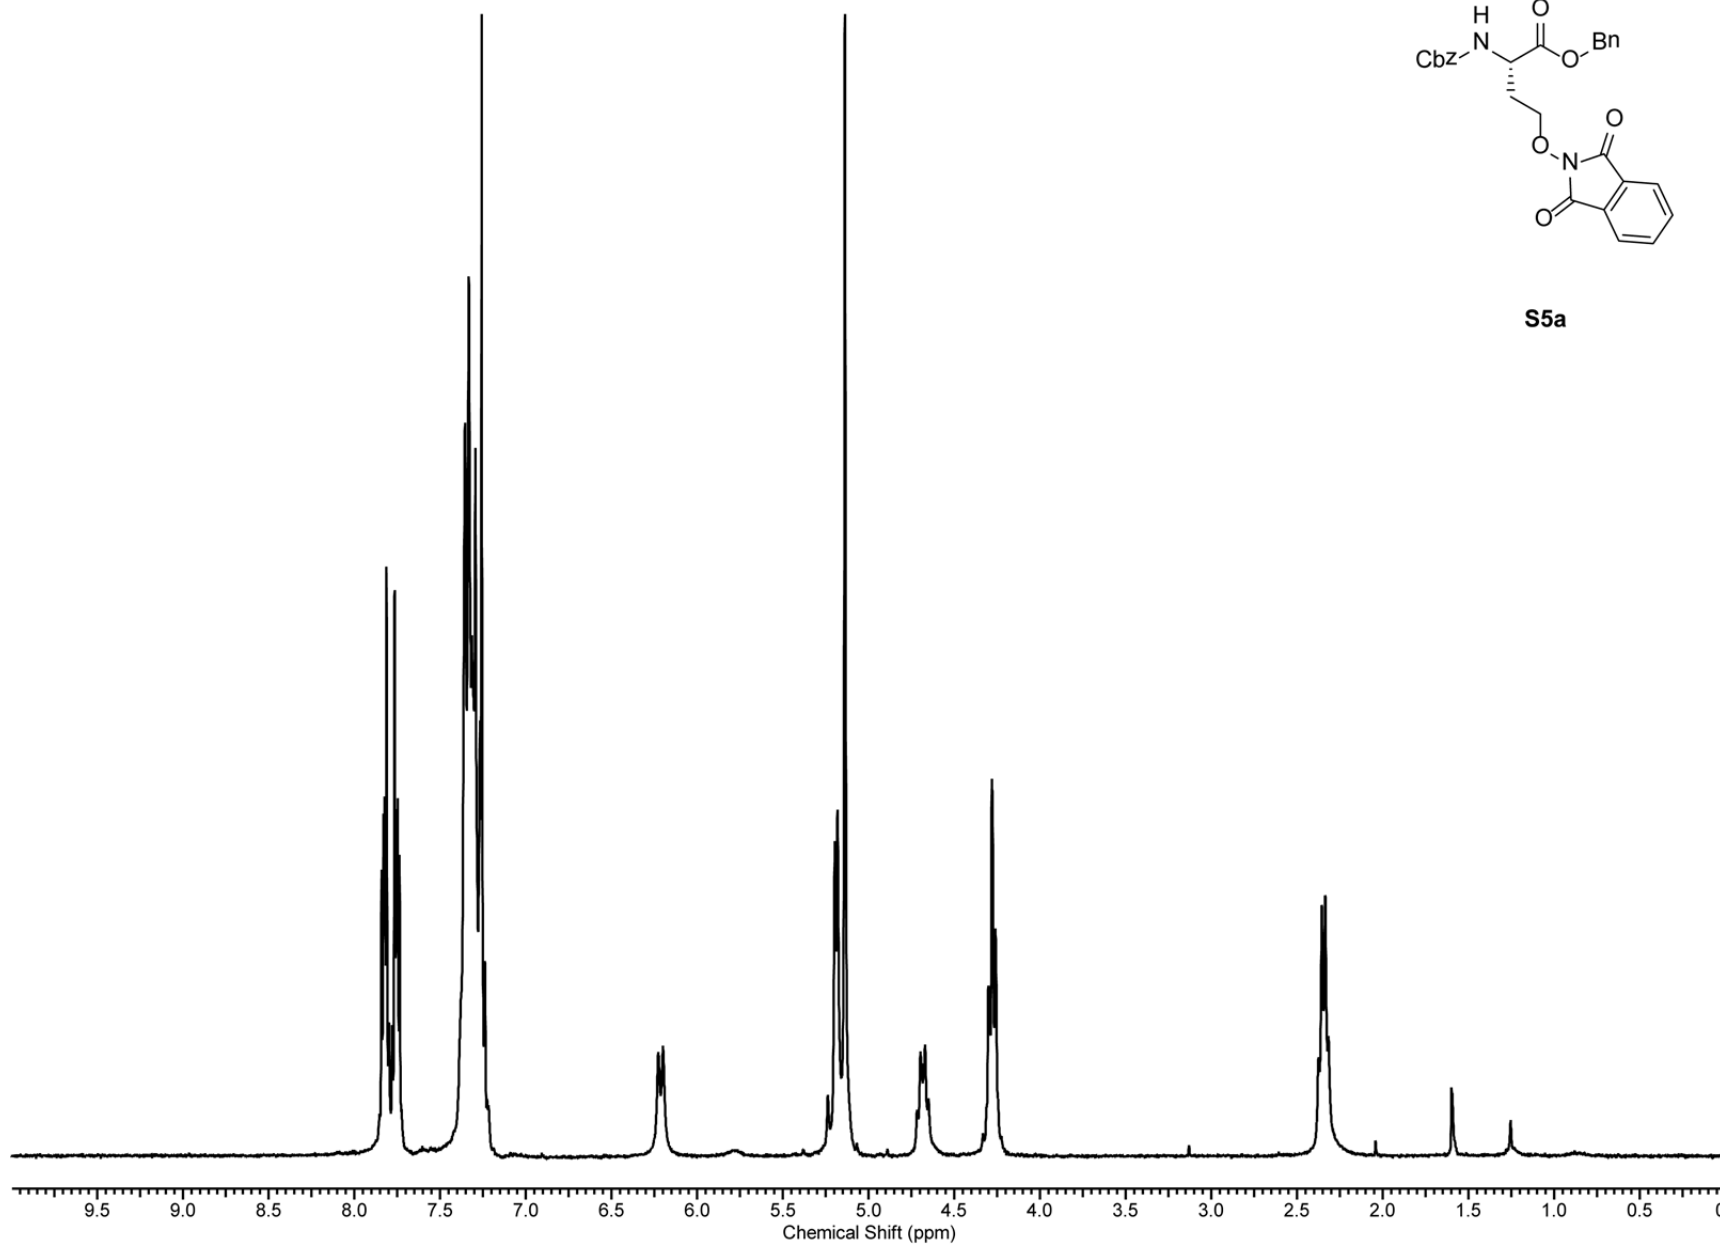

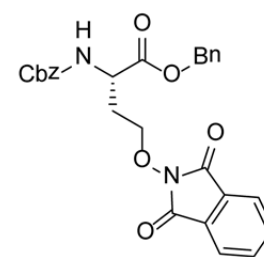

**S5a**

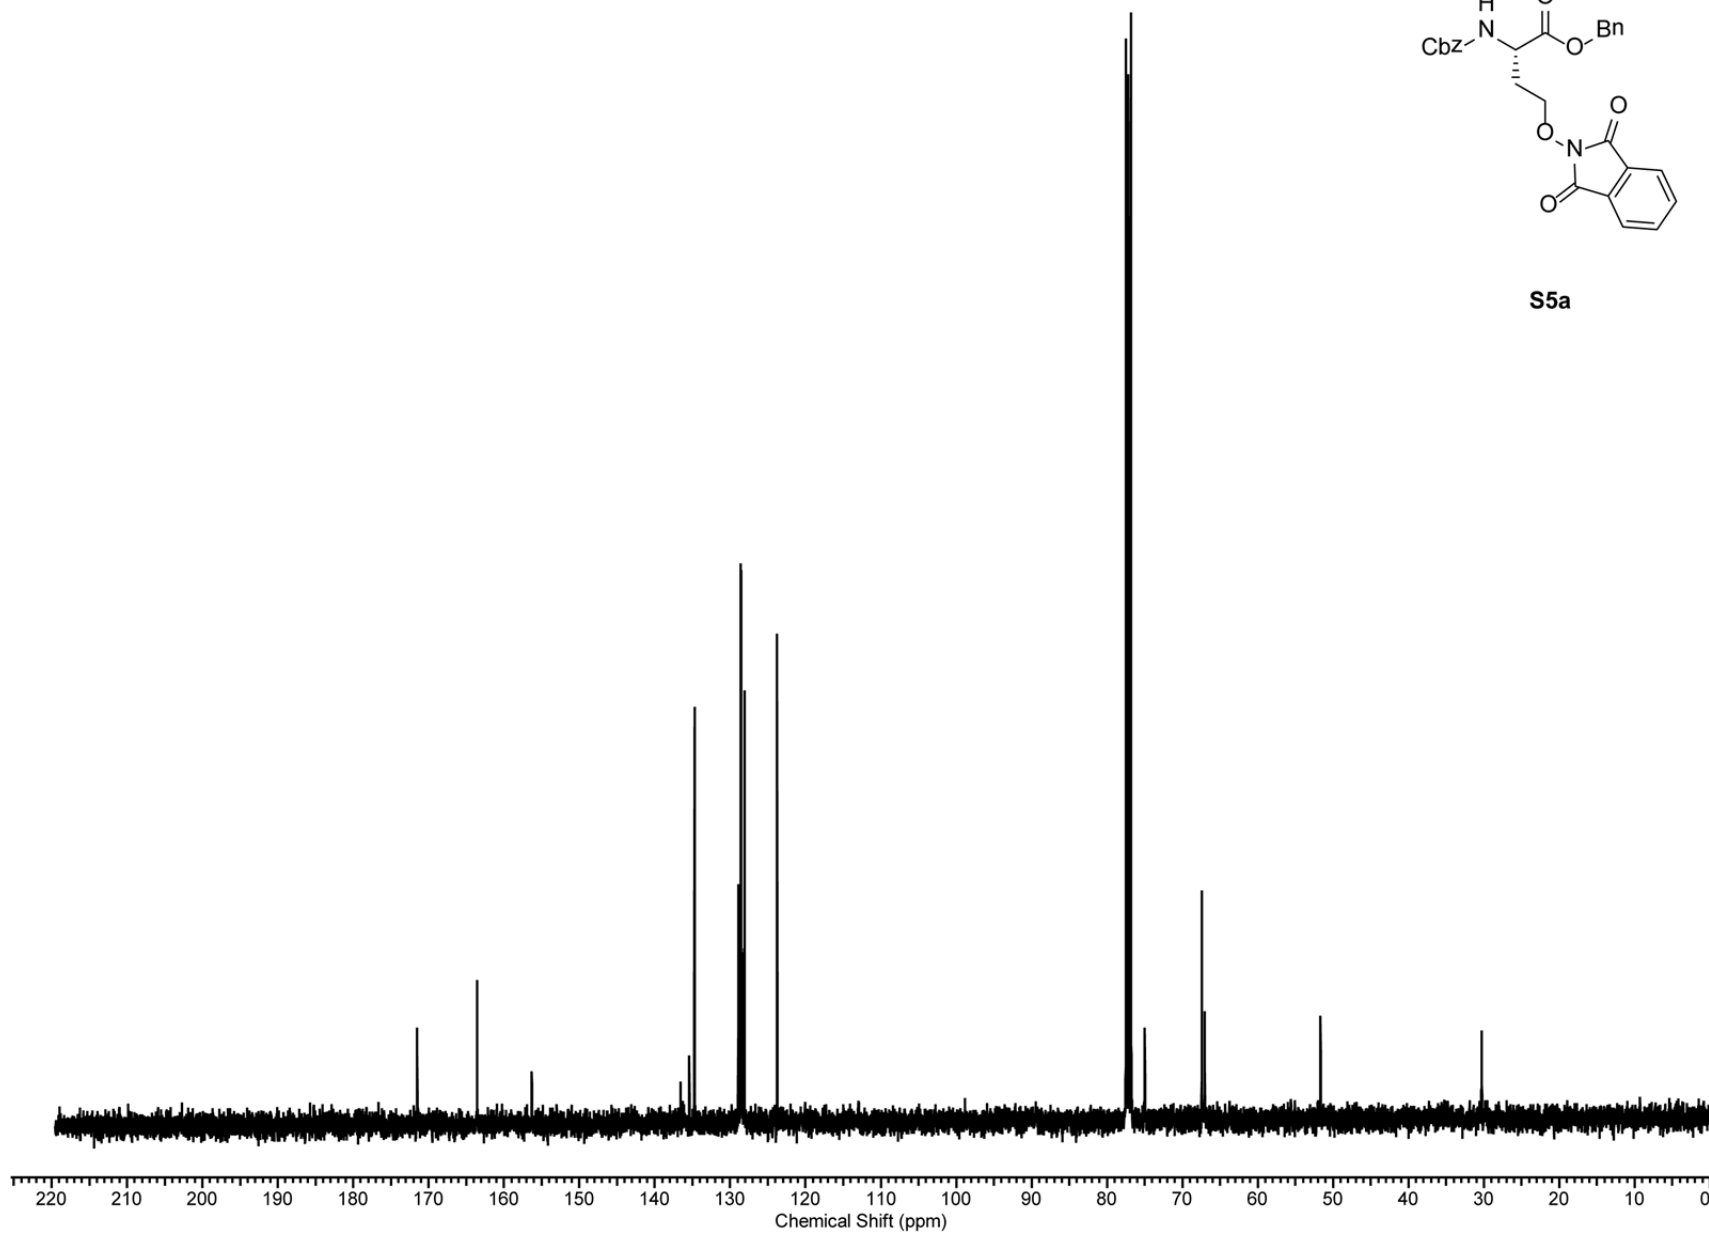



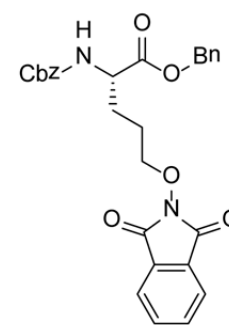

**S5b**

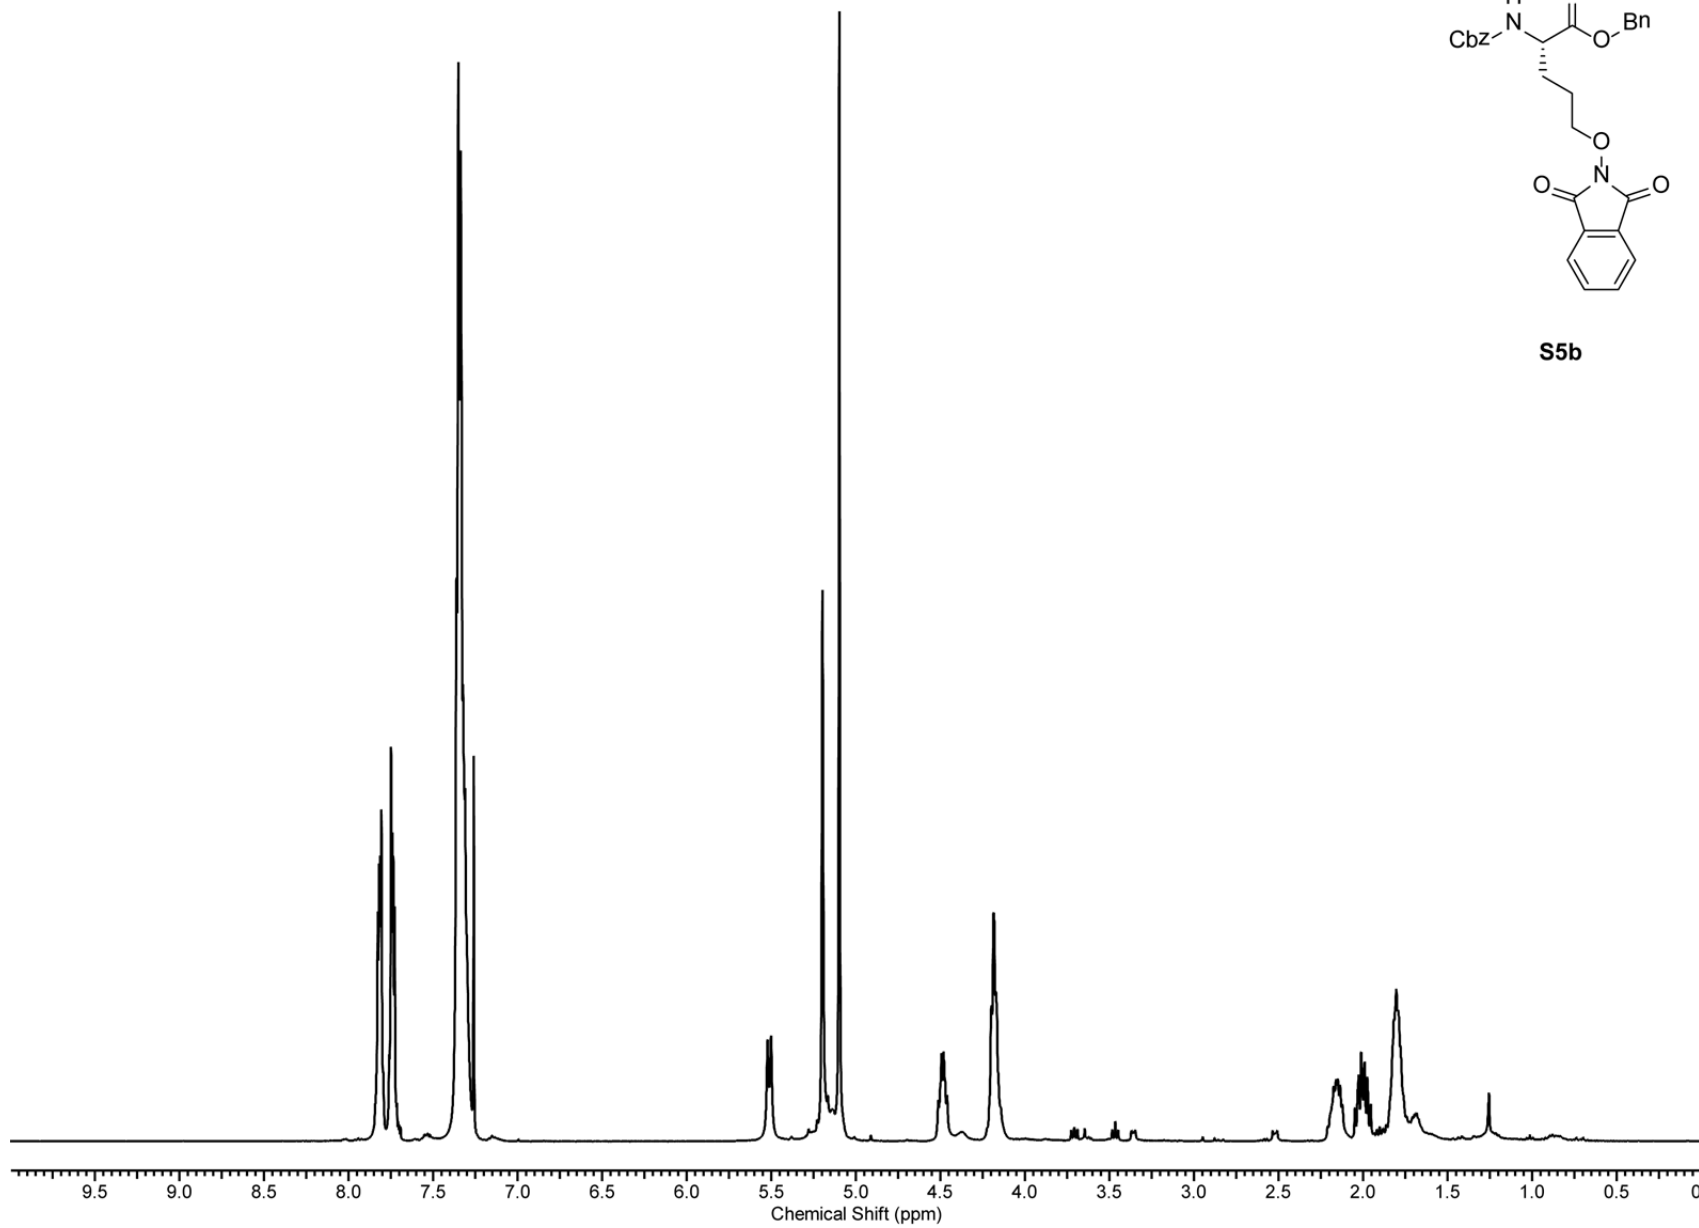

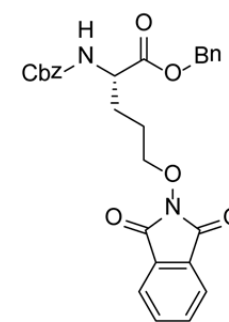

**S5b**

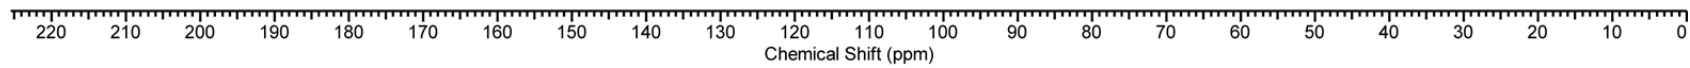

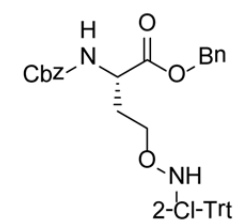

**S6a**

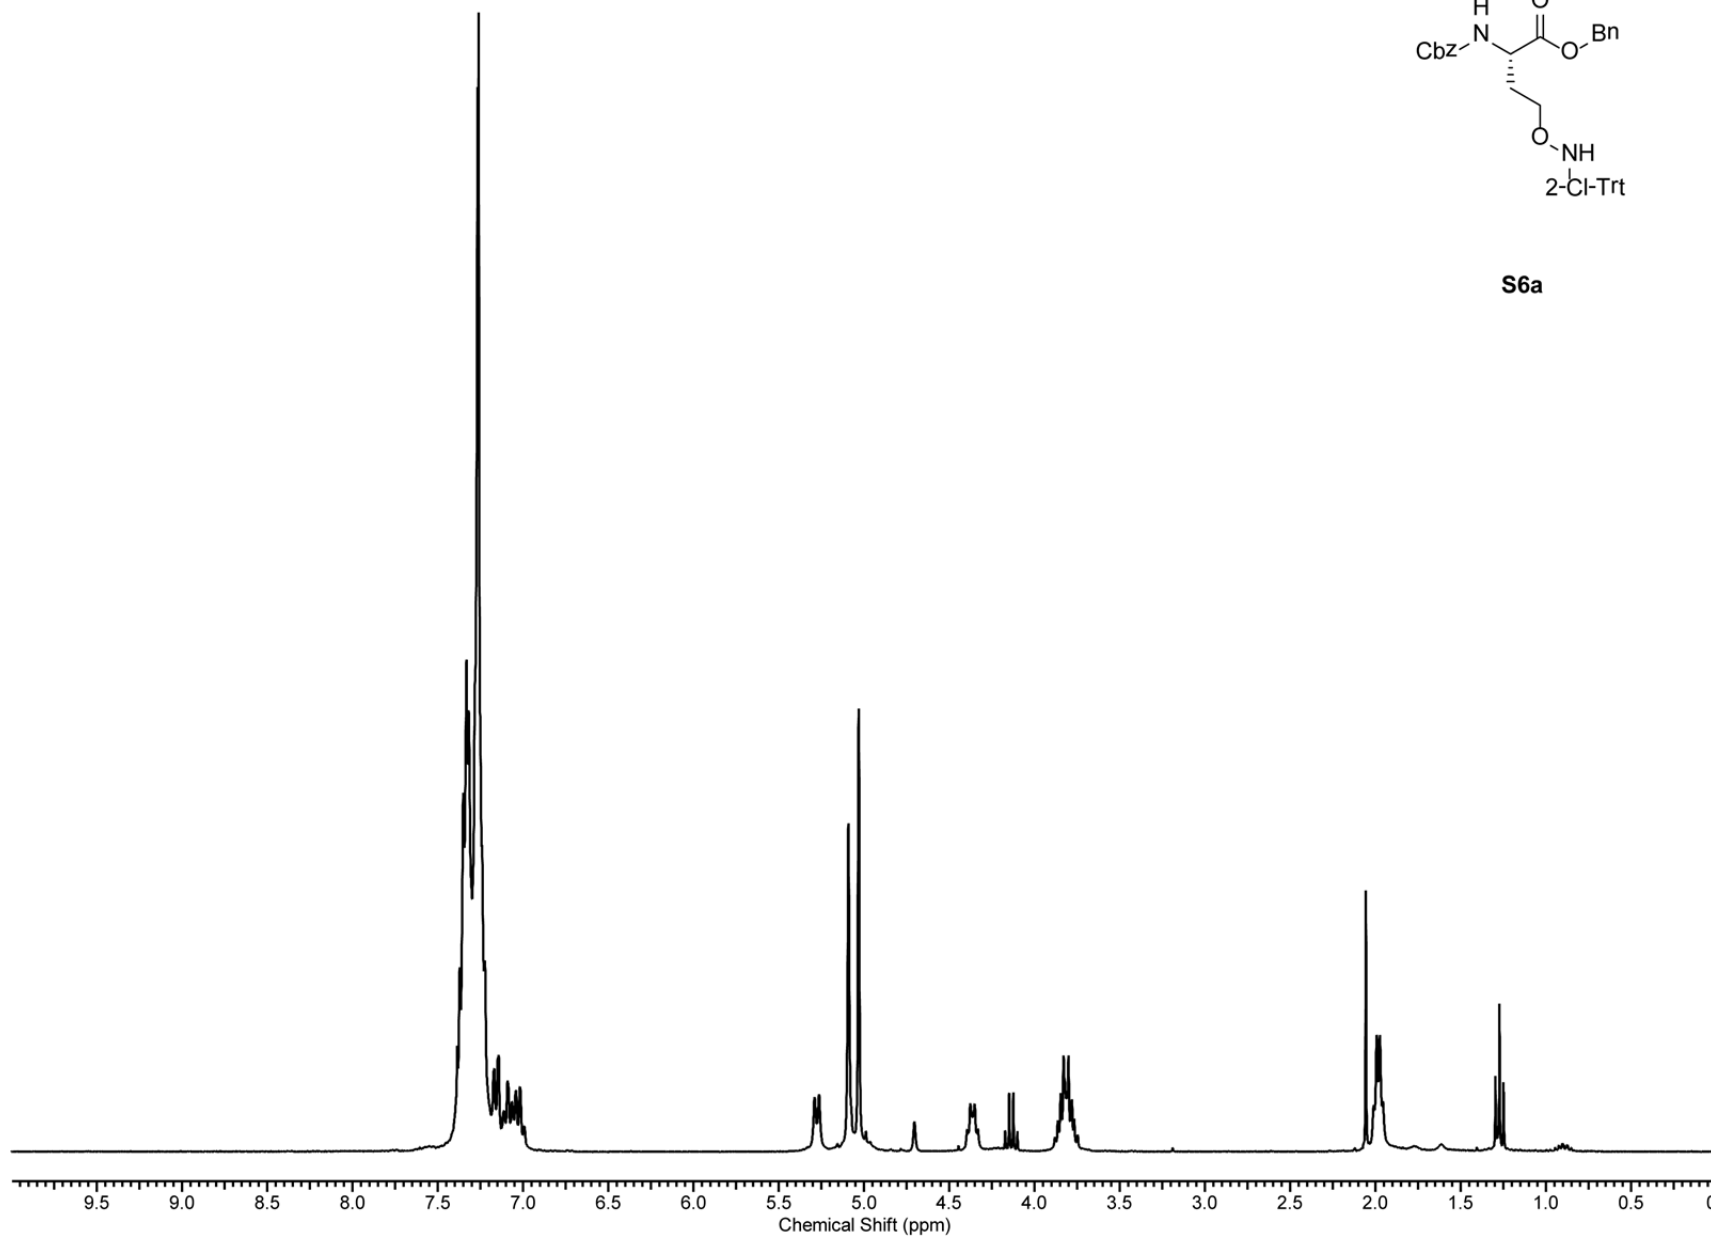

S11

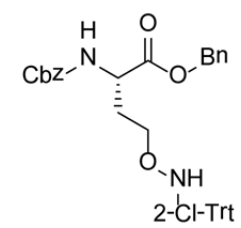

**S6a**

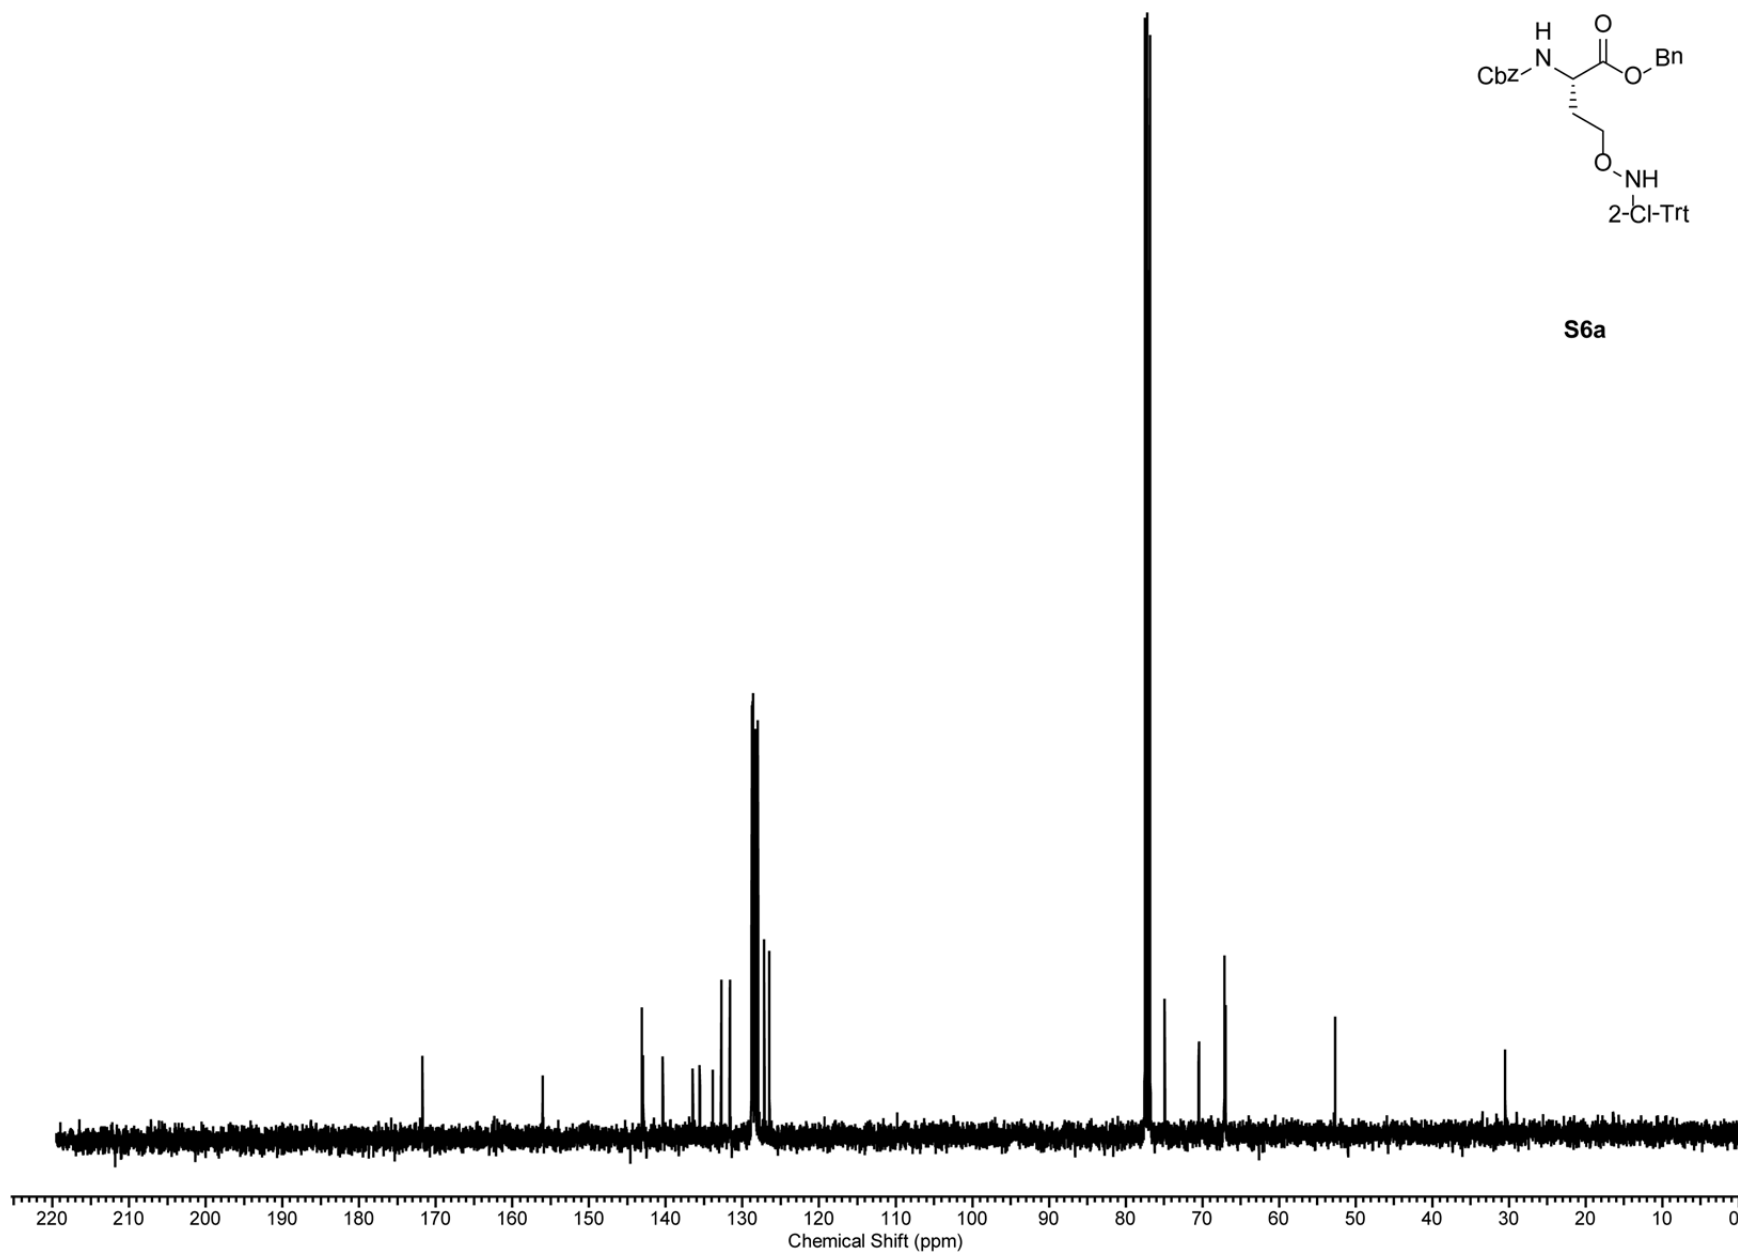

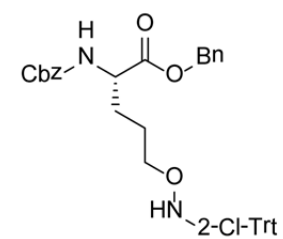

**S6b**

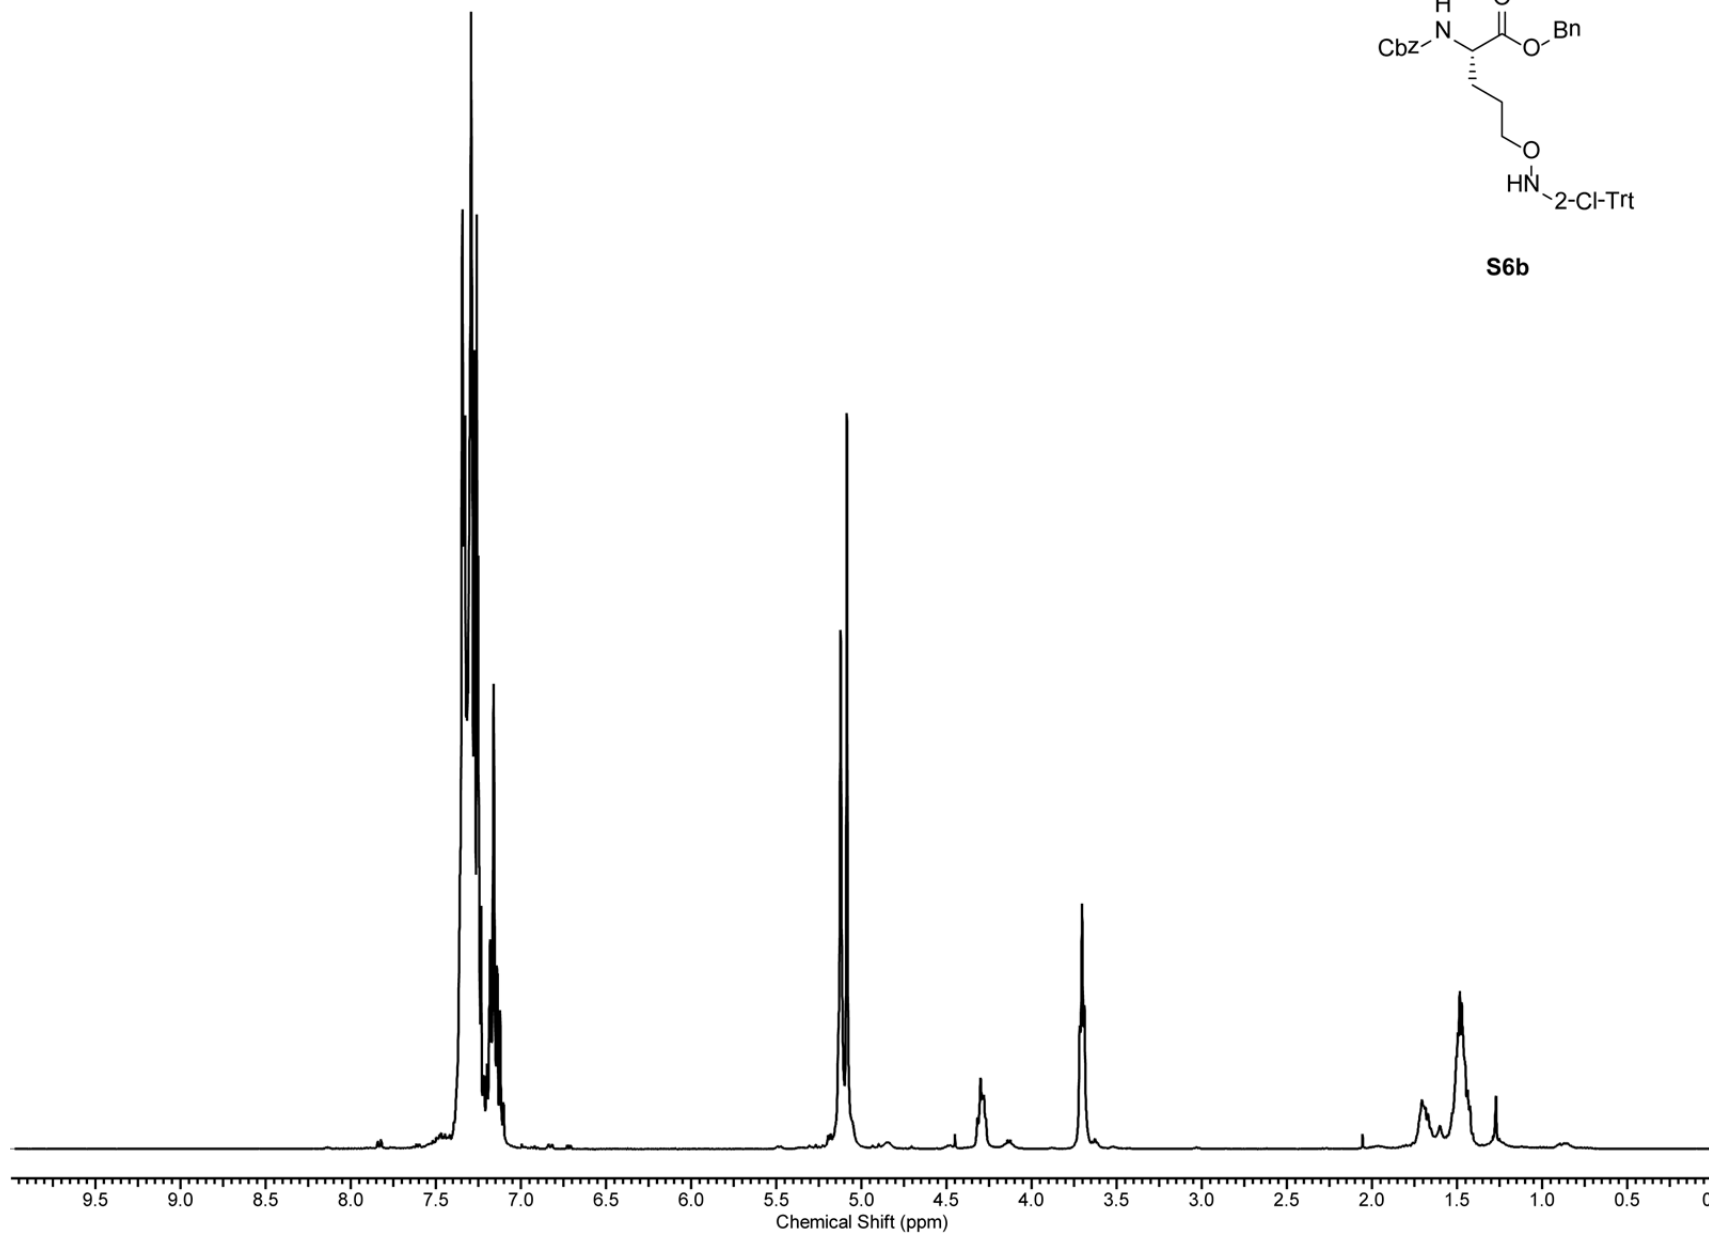

S13

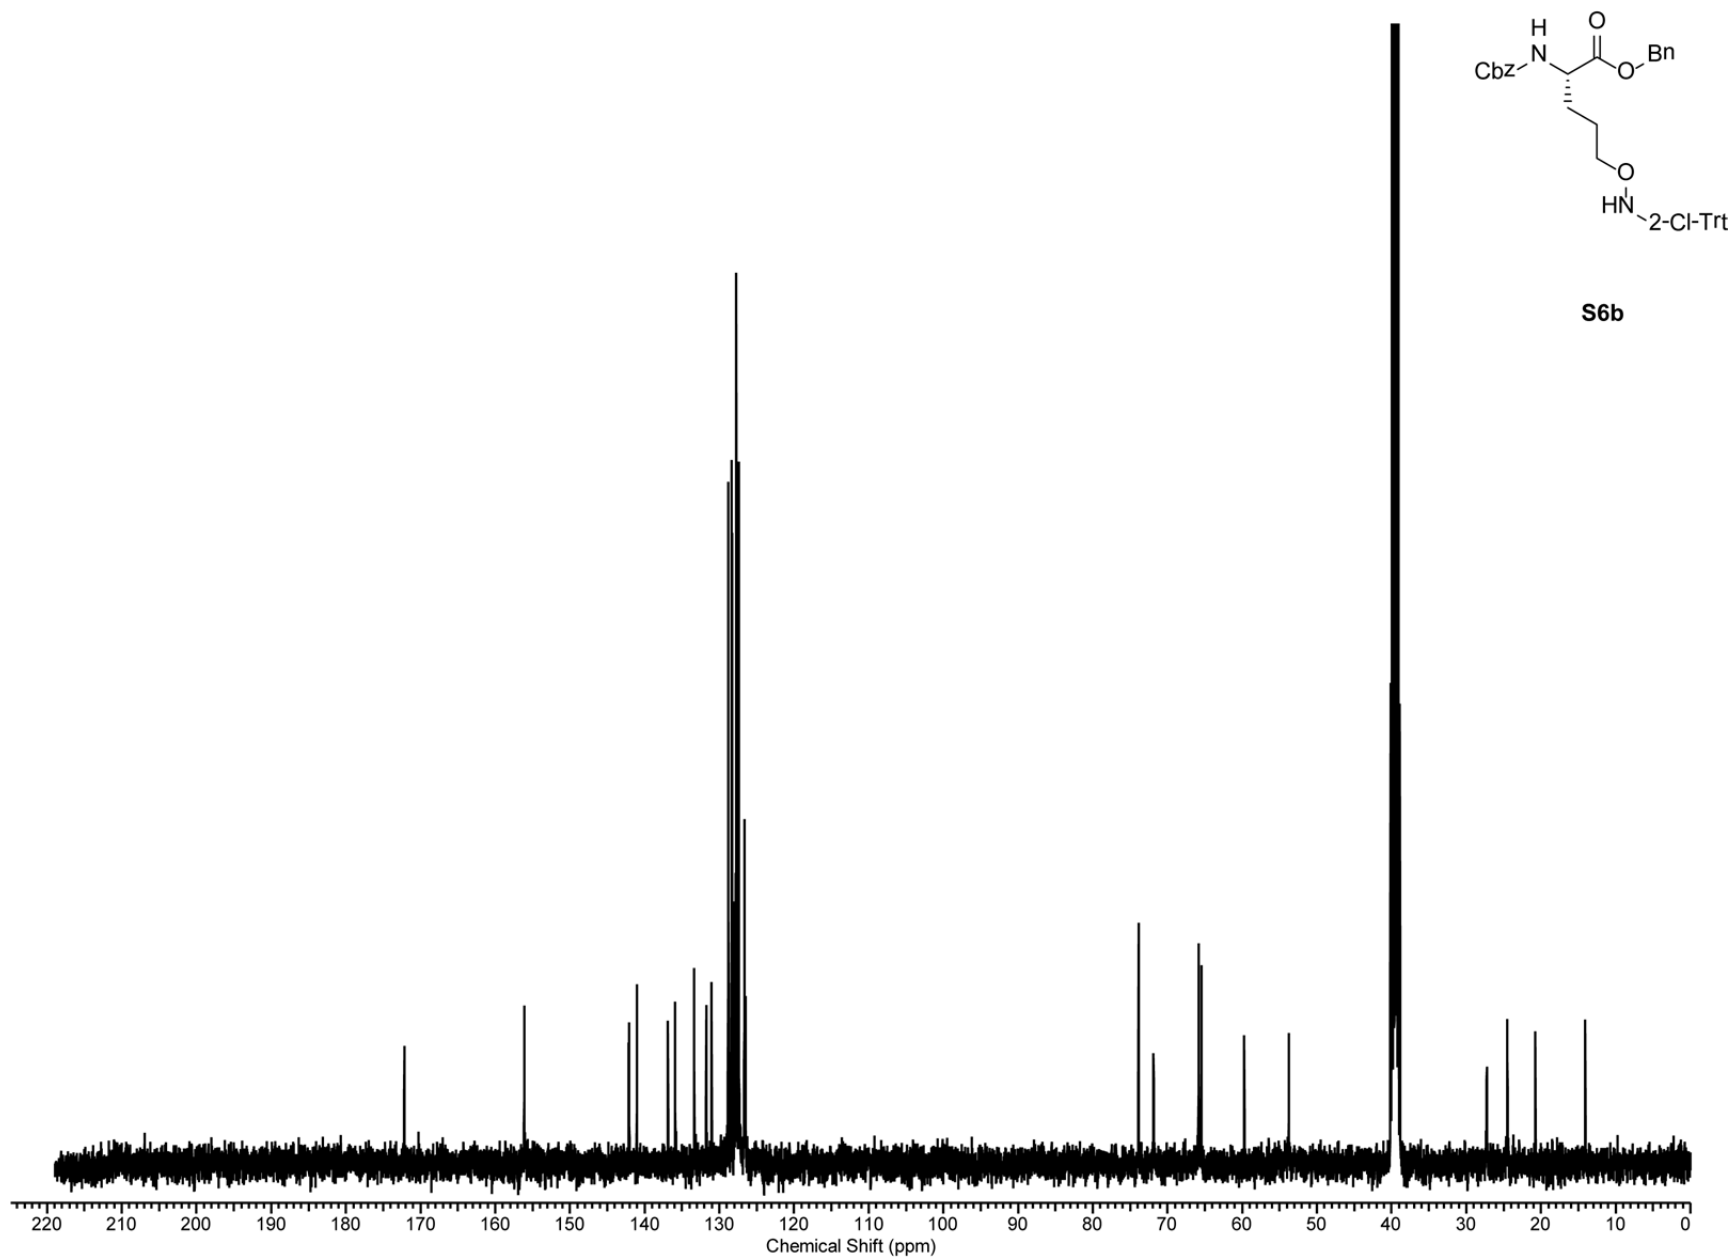

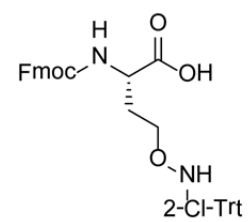

**S7a**

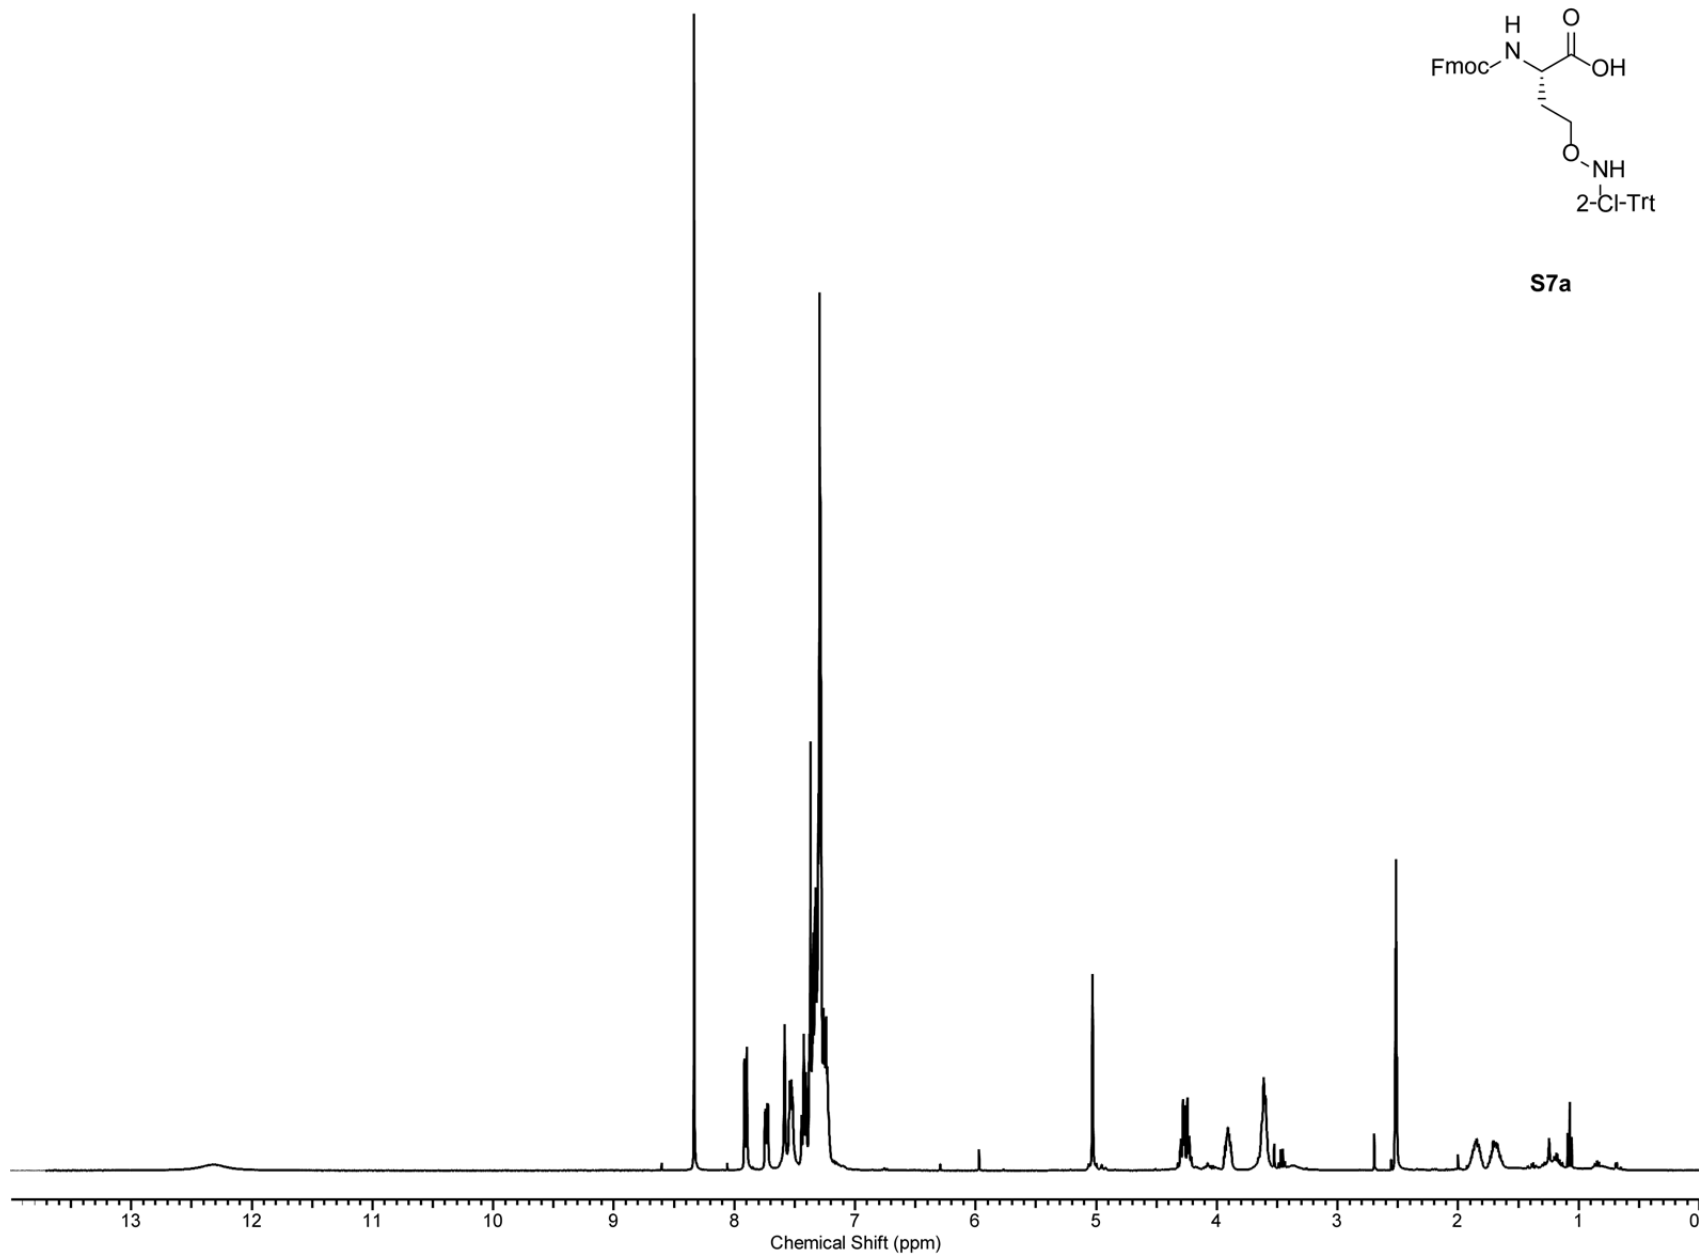

**S15**

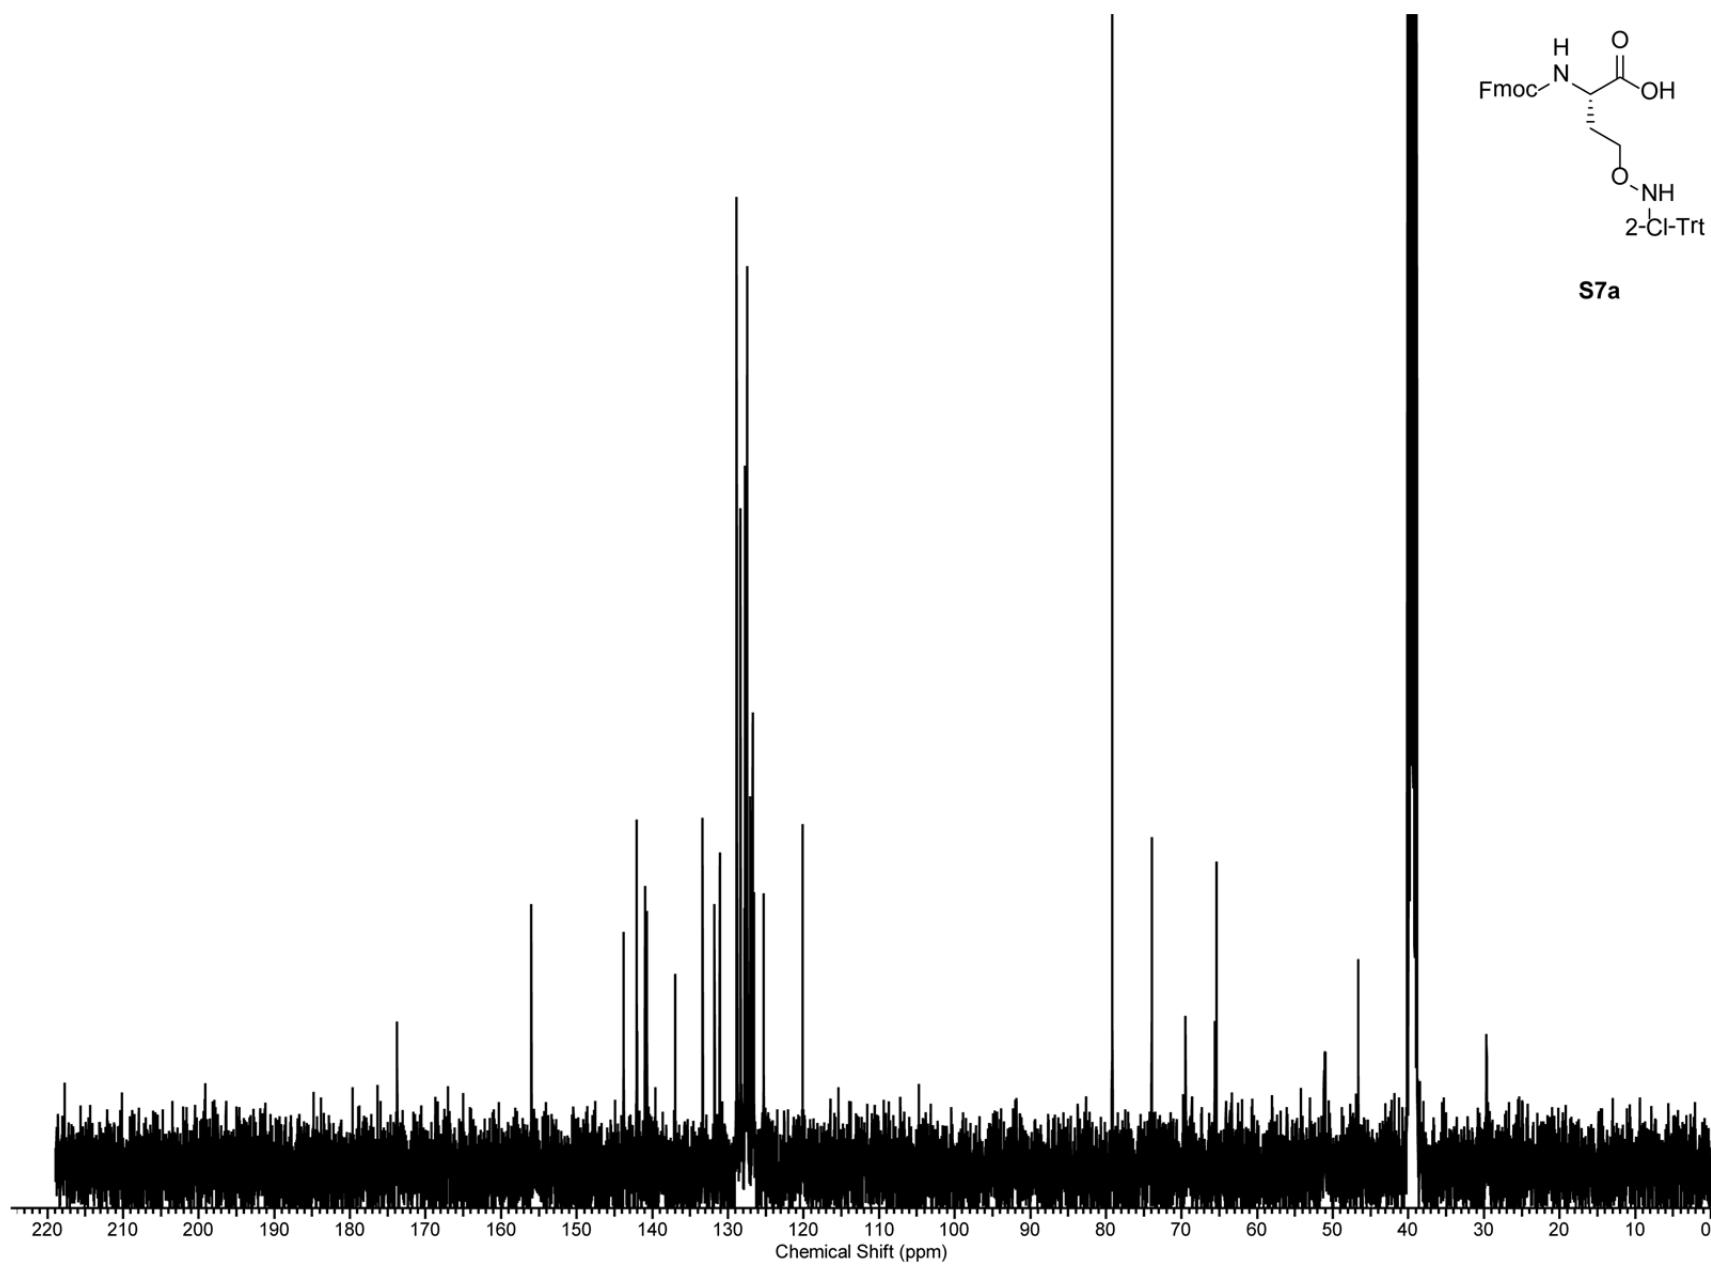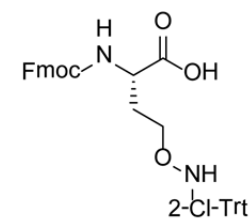

**S7a**



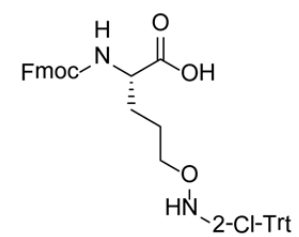

**S7b**

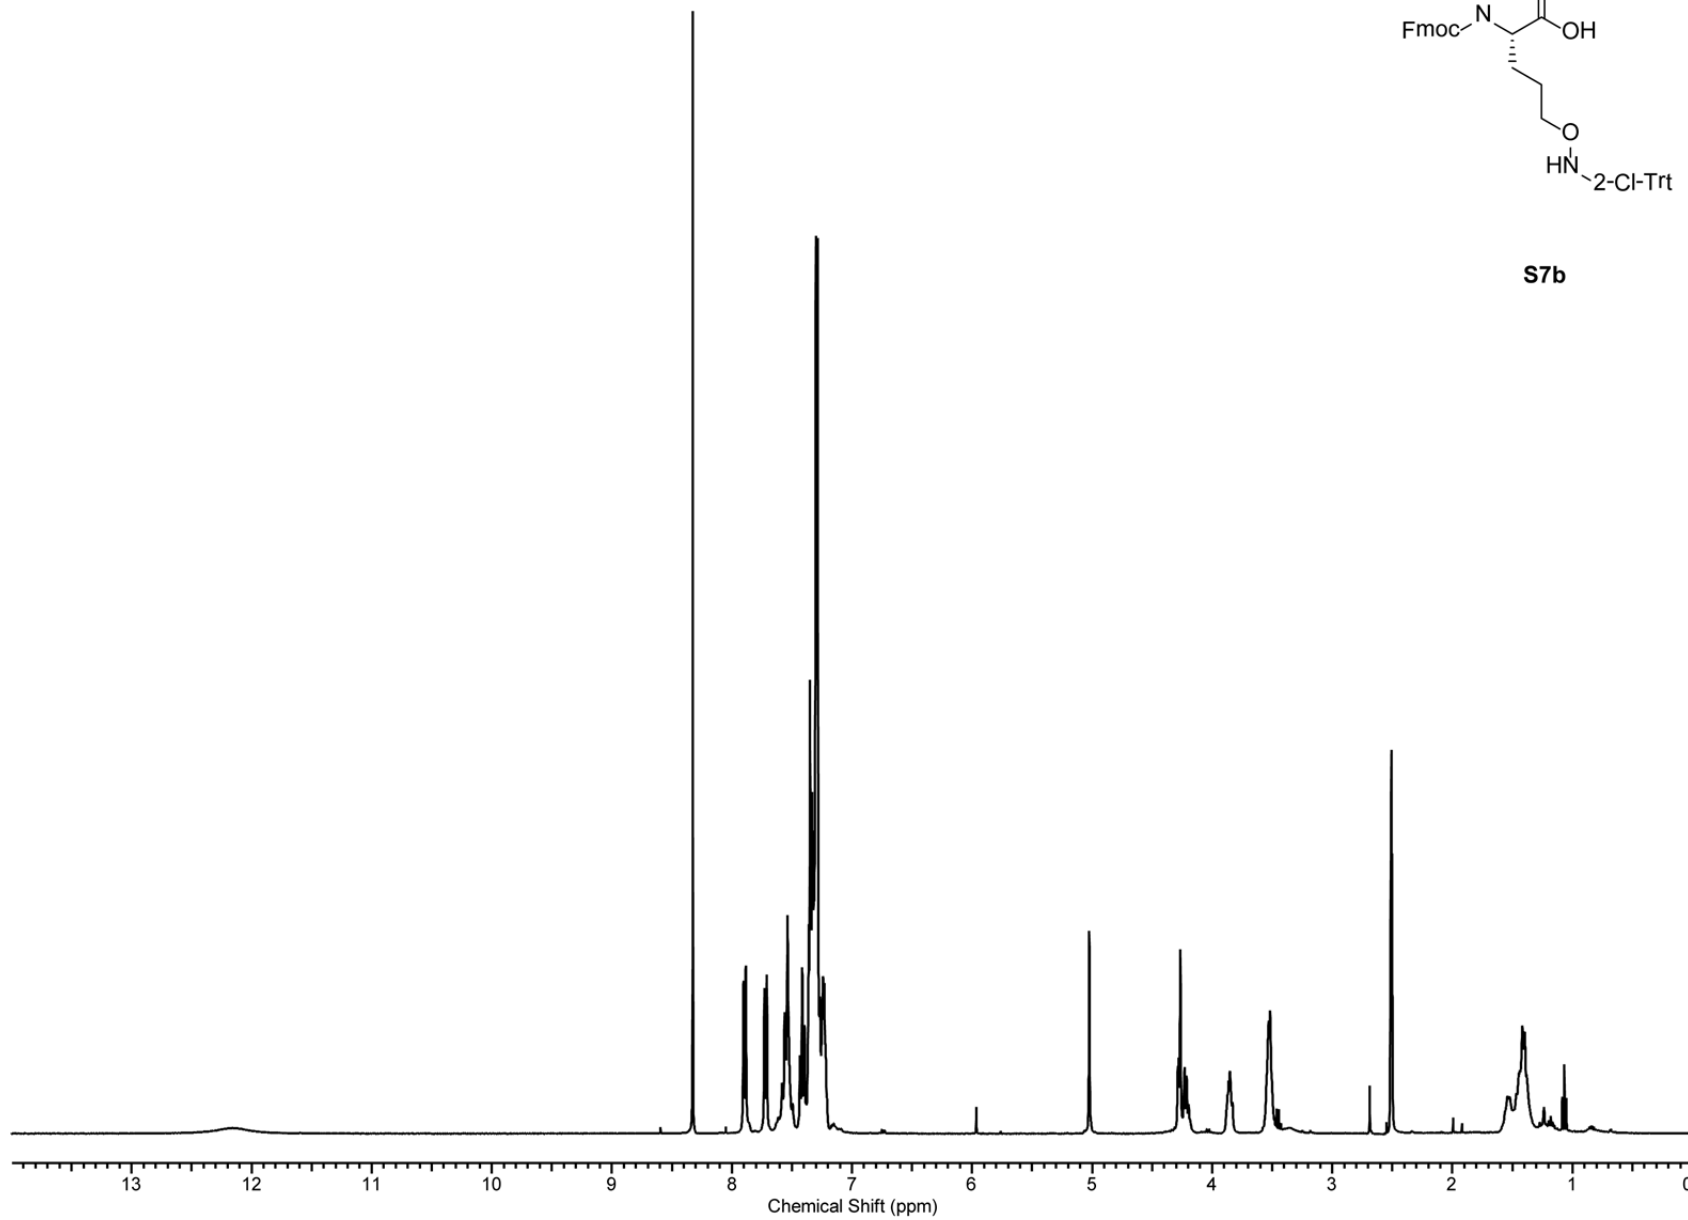

S17

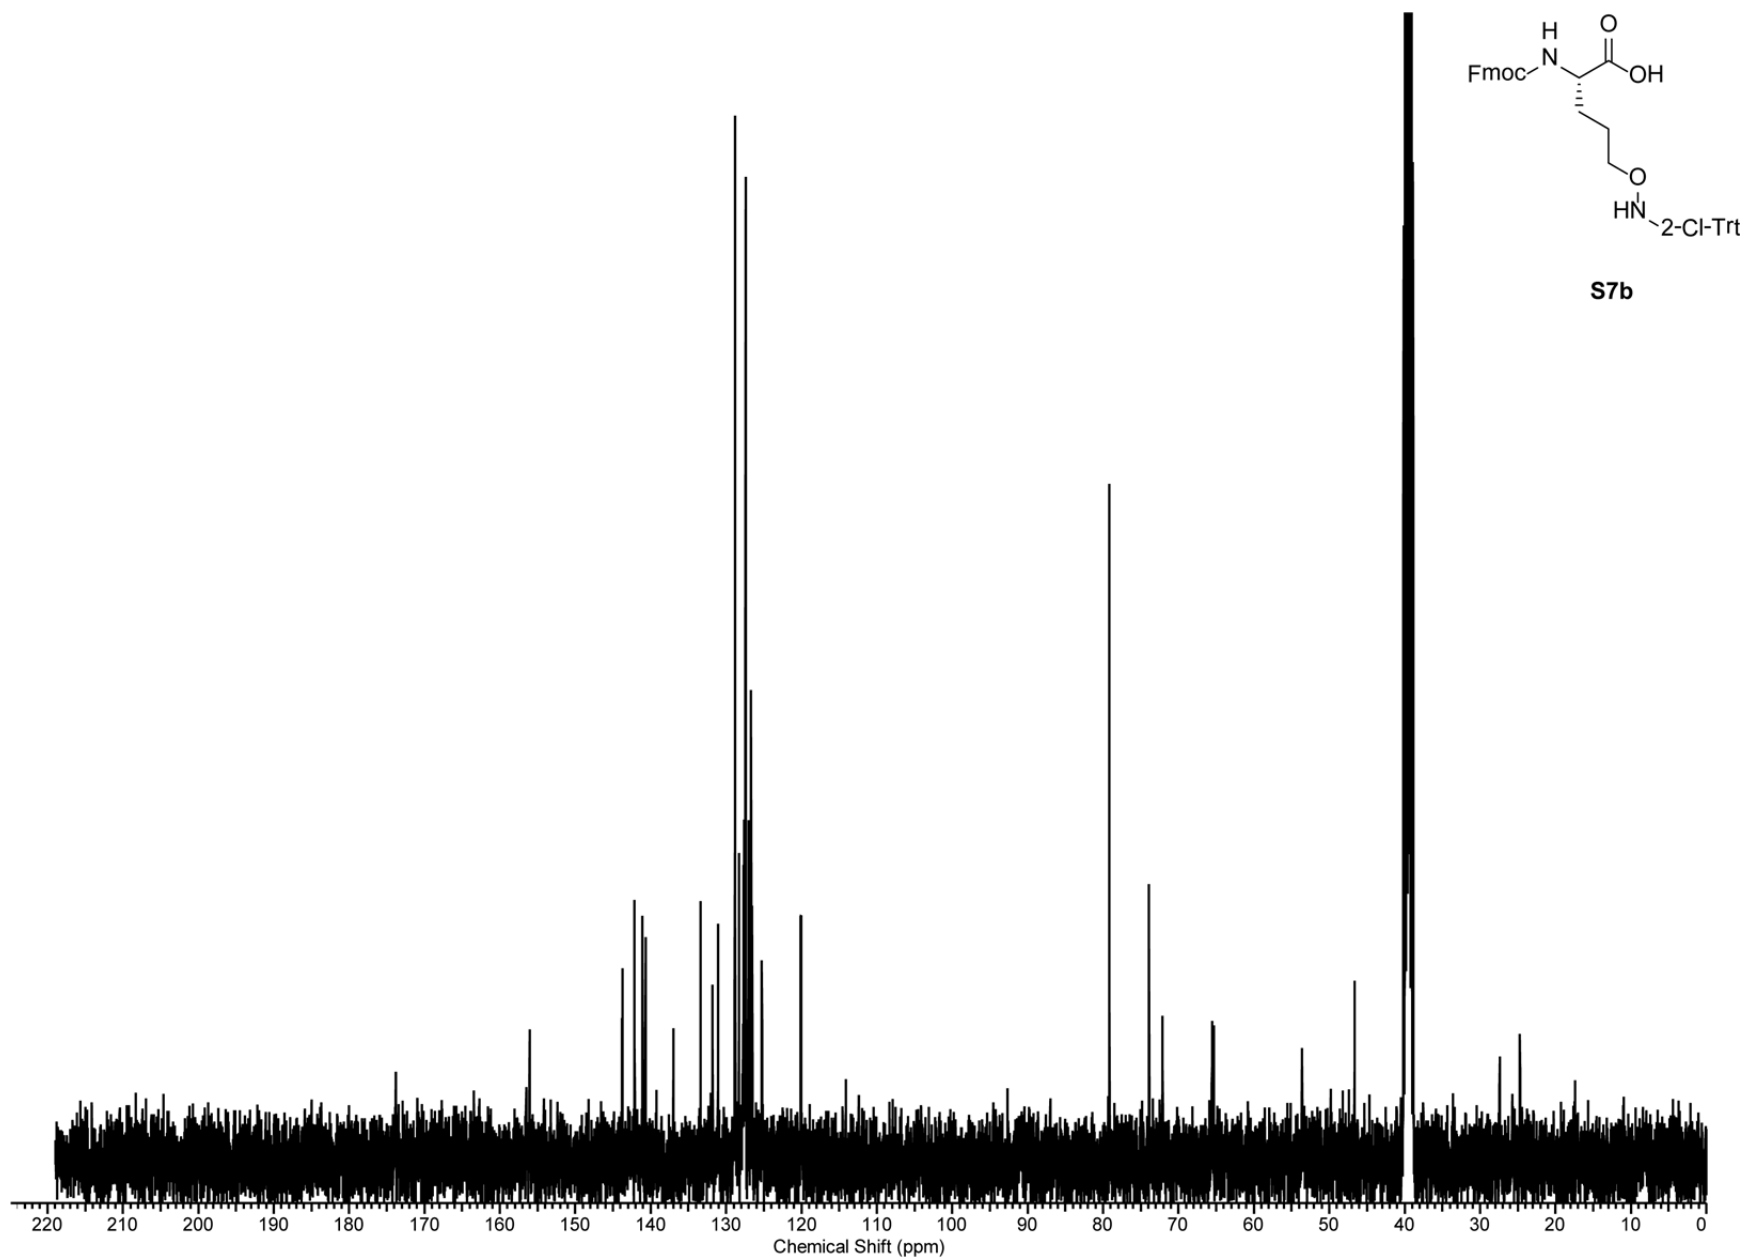

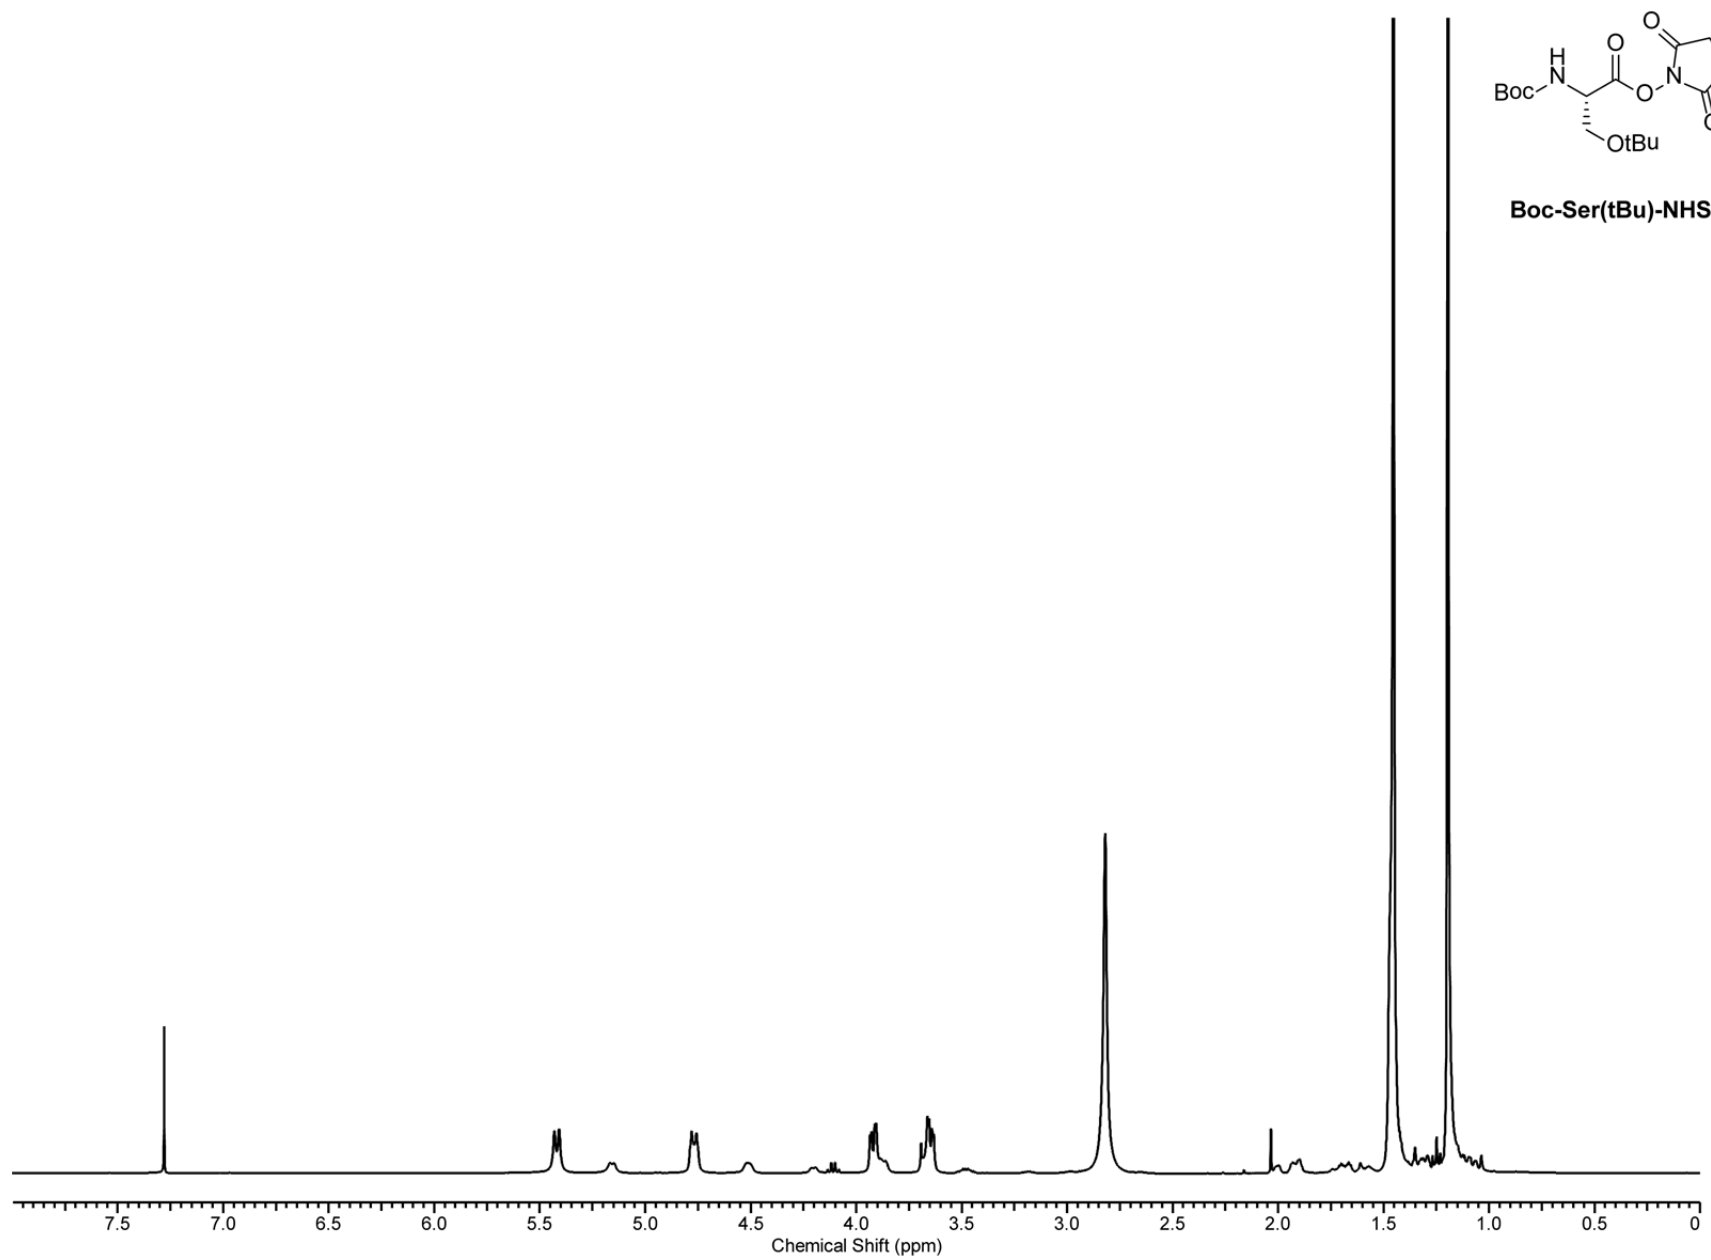

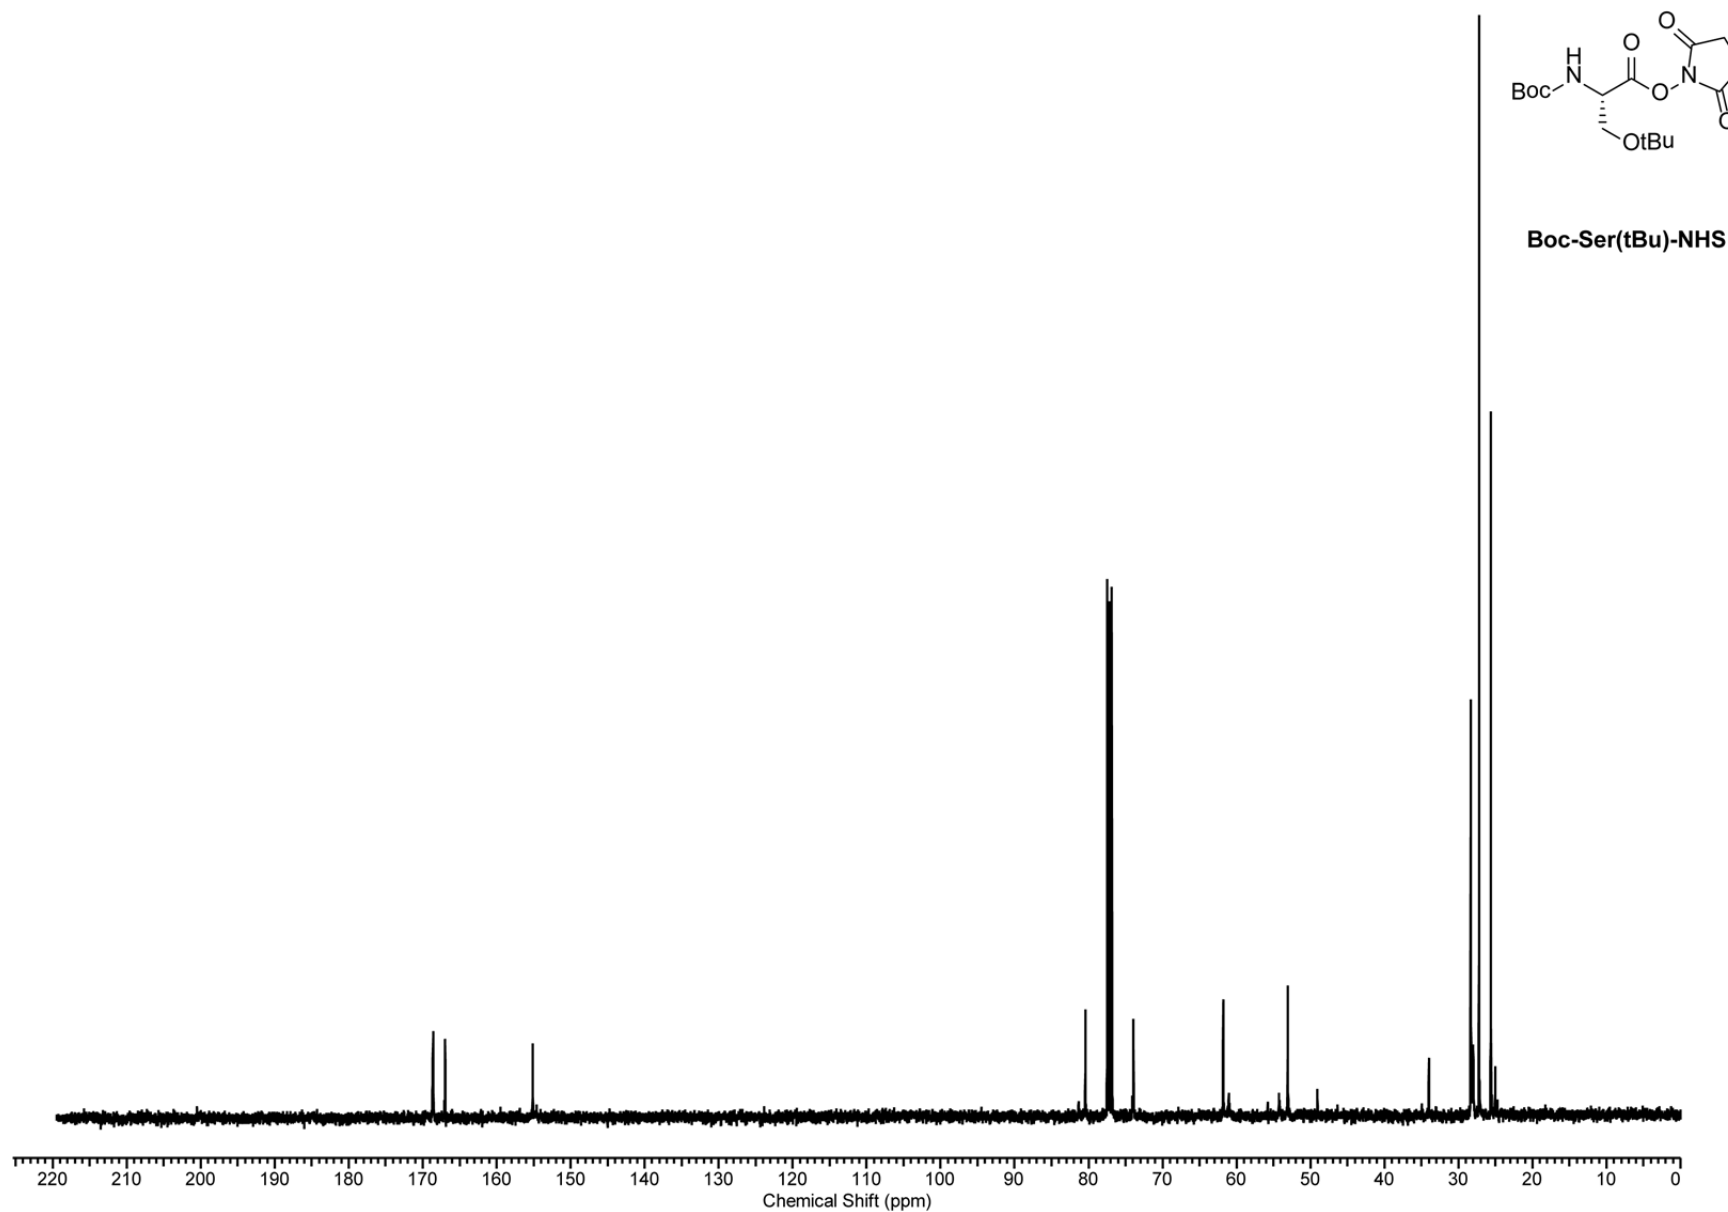

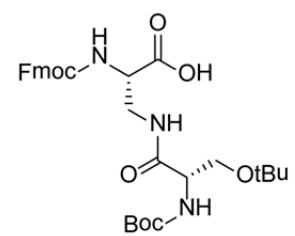

**S8**

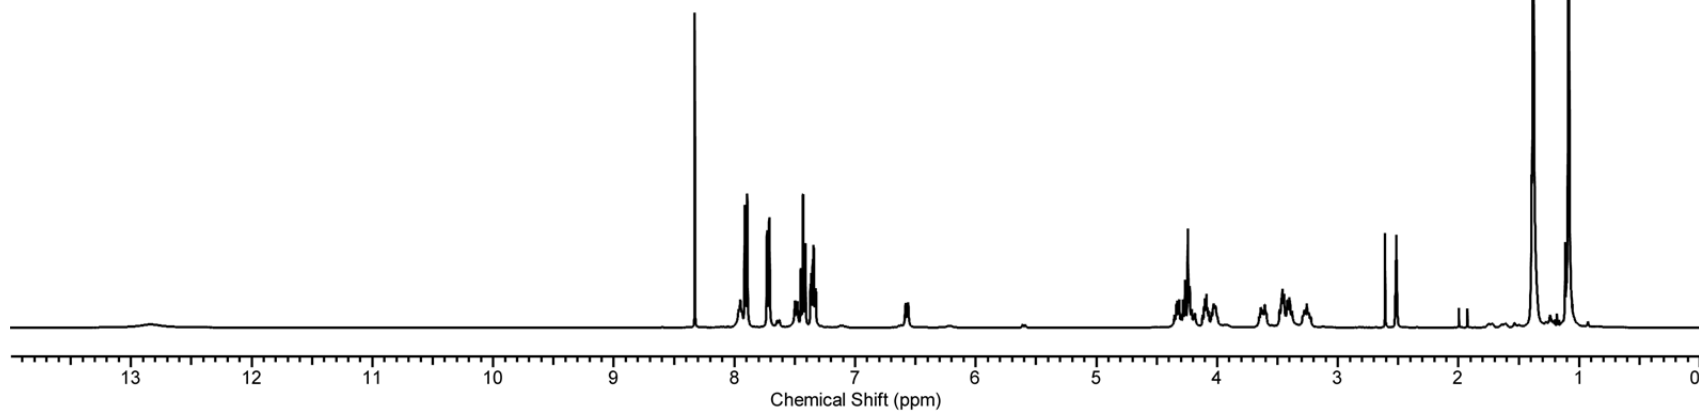

S21

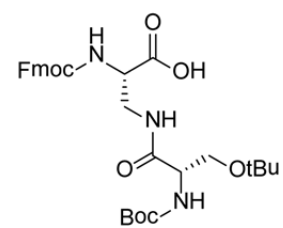

**S8**

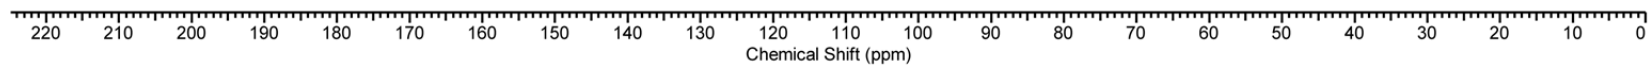

Supplement: c1cc12010g_2.pdf [file c1cc12010g_2.pdf]
